# Supplementary material for: Transcriptional remodelling in response to changing copper levels in the Wilson and Menkes disease model of Saccharomyces cerevisiae
Source: Royal Society of Chemistry journal article supplement (doi:10.1039/c3mb70276f), 2013-08-22
Supplement: c3mb70276f.pdf [file c3mb70276f.pdf]

ESI 2. Reporter proteins identified in response to change in the copper level, deletion of *CCC2* gene and their interacting effect.

| <b>Effector</b> | <b># of Reporter Proteins<br/>(p-value&lt;0.05)</b> | <b>Enriched Biological Process terms<br/>(p-value&lt; 0.01)</b>                                                                                                                                                                                                                                          | <b>TOP 10<br/>Reporter<br/>Proteins</b>                                         |
|-----------------|-----------------------------------------------------|----------------------------------------------------------------------------------------------------------------------------------------------------------------------------------------------------------------------------------------------------------------------------------------------------------|---------------------------------------------------------------------------------|
| Mutant Effect   | 270                                                 | proteolysis<br>response to stress<br>cellular catabolic process<br>phytosteroid biosynthetic process<br>macromolecule catabolic process<br>ubiquitin-dependent protein catabolic<br>process                                                                                                              | RPT5<br>RPN10<br>RPN1<br>RPN11<br>HEK2<br>IGO1<br>BRE5<br>RAD10<br>ATP4<br>NPA3 |
| Copper Effect   | 162                                                 | phytosteroid biosynthetic process<br>cortical actin cytoskeleton<br>organization<br>nitrogen compound transport<br>negative regulation of catabolic<br>process<br>actin filament-based process<br>endocytosis<br>vacuolar transport<br>vesicle-mediated transport<br>hydrogen transport<br>ion transport | TOR2<br>TOR1<br>FMP45<br>SYP1<br>SHE2<br>RSP5<br>CHC1<br>RPN11<br>SPS1<br>SRO9  |

|                    |     |                                                                                                                                                                                                                                                                                                                                                                                                                                                                                               |                                                                              |
|--------------------|-----|-----------------------------------------------------------------------------------------------------------------------------------------------------------------------------------------------------------------------------------------------------------------------------------------------------------------------------------------------------------------------------------------------------------------------------------------------------------------------------------------------|------------------------------------------------------------------------------|
| Interaction Effect | 193 | ubiquitin-dependent protein catabolic<br>process<br>protein complex biogenesis<br>macromolecule catabolic process<br>vitamin B6 biosynthetic process<br>cytoplasmic translation<br>ATP biosynthetic process<br>proton transport<br>hydrogen transport<br>heterocycle biosynthetic process<br>aromatic compound biosynthetic<br>process<br>cellular nitrogen compound<br>biosynthetic process<br>nucleotide metabolic process<br>anti-apoptosis<br>cellular macromolecule metabolic<br>process | VTC1<br>ATP4<br>RPF2<br>PET9<br>ATP6<br>RPT6<br>RPT5<br>HSM3<br>FCJ1<br>MAP1 |
|--------------------|-----|-----------------------------------------------------------------------------------------------------------------------------------------------------------------------------------------------------------------------------------------------------------------------------------------------------------------------------------------------------------------------------------------------------------------------------------------------------------------------------------------------|------------------------------------------------------------------------------|
