# Supplementary material for: Transcriptional remodelling in response to changing copper levels in the Wilson and Menkes disease model of Saccharomyces cerevisiae
Source: Royal Society of Chemistry journal article supplement (doi:10.1039/c3mb70276f), 2013-08-22
Supplement: c3mb70276f.xlsx [file c3mb70276f.xlsx]

## Sheet: tf-condensus-sgd-direct-evidenc
Rap1p	tf	LSR1
Mig1p	tf	MAL61
Mig1p	tf	MAL62
Rtg3p	tf	MATA1
Rtg3p	tf	MATA2
Mig1p	tf	MEL1
Gal4p	tf	MEL1
Yap5p	tf	Q0050
Yap5p	tf	Q0075
Hap4p	tf	Q0075
Yap6p	tf	Q0080
Cin5p	tf	Q0080
Rap1p	tf	Q0110
Yap5p	tf	Q0115
Pdr1p	tf	Q0115
Yap5p	tf	Q0120
Smp1p	tf	Q0120
Pdr1p	tf	Q0120
Pdr1p	tf	Q0140
Swi4p	tf	RDN5-6
Rme1p	tf	RDN5-6
Mbp1p	tf	RDN5-6
Rap1p	tf	RPR1
Stp2p	tf	SNR128
Dal81p	tf	SNR128
Cup9p	tf	SNR128
Ixr1p	tf	SNR13
Gcr1p	tf	SNR13
Ixr1p	tf	SNR14
Abf1p	tf	SNR14
Rap1p	tf	SNR17a
Rap1p	tf	SNR17b
Yap1p	tf	SNR18
Reb1p	tf	SNR189
Yap6p	tf	SNR190
Rph1p	tf	SNR190
Rox1p	tf	SNR190
Rme1p	tf	SNR190
Rlm1p	tf	SNR190
Reb1p	tf	SNR190
Met31p	tf	SNR190
Mbp1p	tf	SNR190
Mac1p	tf	SNR190
Hap3p	tf	SNR190
Hap2p	tf	SNR190
Gln3p	tf	SNR190
Gcr1p	tf	SNR190
Fzf1p	tf	SNR190
Cha4p	tf	SNR190
Azf1p	tf	SNR190
Cup9p	tf	SNR190
Gcr2p	tf	SNR190
Phd1p	tf	SNR190
Sum1p	tf	SNR37
Stp1p	tf	SNR37
Sip4p	tf	SNR37
Rlm1p	tf	SNR37
Hap5p	tf	SNR37
Hap4p	tf	SNR37
Cin5p	tf	SNR37
Bas1p	tf	SNR37
Azf1p	tf	SNR37
Arg80p	tf	SNR37
Cup9p	tf	SNR37
Put3p	tf	SNR4
Rme1p	tf	SNR42
Fzf1p	tf	SNR44
Cup9p	tf	SNR44
Gln3p	tf	SNR45
Gcn4p	tf	SNR45
Dal81p	tf	SNR45
Stp2p	tf	SNR46
Dal81p	tf	SNR46
Rox1p	tf	SNR47
Rme1p	tf	SNR47
Azf1p	tf	SNR47
Abf1p	tf	SNR47
Rox1p	tf	SNR54
Pdr1p	tf	SNR55
Arg80p	tf	SNR55
Met31p	tf	SNR56
Yap6p	tf	SNR57
Yap1p	tf	SNR57
Smp1p	tf	SNR57
Rox1p	tf	SNR57
Rlm1p	tf	SNR57
Hap2p	tf	SNR57
Fzf1p	tf	SNR57
Cin5p	tf	SNR57
Abf1p	tf	SNR57
Cup9p	tf	SNR57
Gcr2p	tf	SNR57
Rme1p	tf	SNR59
Cup9p	tf	SNR59
Yap1p	tf	SNR6
Rph1p	tf	SNR6
Rox1p	tf	SNR6
Rme1p	tf	SNR6
Rfx1p	tf	SNR6
Ixr1p	tf	SNR6
Gcr1p	tf	SNR6
Yap1p	tf	SNR60
Ace2p	tf	SNR60
Sum1p	tf	SNR61
Pdr1p	tf	SNR61
Dal81p	tf	SNR61
Bas1p	tf	SNR61
Arg81p	tf	SNR61
Arg80p	tf	SNR61
Sko1p	tf	SNR64
Yap1p	tf	SNR66
Ste12p	tf	SNR66
Fkh2p	tf	SNR66
Stp2p	tf	SNR67
Rtg3p	tf	SNR67
Dal81p	tf	SNR67
Arg80p	tf	SNR67
Cup9p	tf	SNR67
Stp1p	tf	SNR70
Rme1p	tf	SNR70
Reb1p	tf	SNR70
Hap2p	tf	SNR70
Gcr1p	tf	SNR70
Cha4p	tf	SNR70
Bas1p	tf	SNR70
Met31p	tf	SNR71
Arg81p	tf	SNR71
Arg80p	tf	SNR71
Cup9p	tf	SNR71
Rap1p	tf	SNR72
Rap1p	tf	SNR73
Rap1p	tf	SNR74
Rap1p	tf	SNR75
Rap1p	tf	SNR76
Rap1p	tf	SNR77
Rap1p	tf	SNR78
Reb1p	tf	SNR8
Put3p	tf	SNR8
Rap1p	tf	SNR87
Cha4p	tf	SRG1
Tec1p	tf	STA1
Ste12p	tf	STA1
Sfl1p	tf	STA1
Nrg1p	tf	STA1
Mss11p	tf	STA1
Flo8p	tf	STA1
Rap1p	tf	tA(AGC)D
Rap1p	tf	tA(AGC)G
Hsf1p	tf	tA(AGC)G
Yap1p	tf	tA(AGC)K2
Rap1p	tf	tA(AGC)K2
Swi4p	tf	tA(AGC)P
Skn7p	tf	tA(AGC)P
Cin5p	tf	tA(AGC)P
Mac1p	tf	tA(UGC)A
Pho2p	tf	tC(GCA)B
Mac1p	tf	tC(GCA)P2
Rox1p	tf	tD(GUC)B
Stp2p	tf	tD(GUC)G1
Rox1p	tf	tD(GUC)J2
Mbp1p	tf	tD(GUC)J2
Yap1p	tf	tD(GUC)K
Ixr1p	tf	tD(GUC)L1
Pho2p	tf	tE(CUC)D
Rox1p	tf	tE(CUC)D
Rlm1p	tf	tE(CUC)D
Rim101p	tf	tE(CUC)D
Ino4p	tf	tE(CUC)D
Ino2p	tf	tE(CUC)D
Gcr2p	tf	tE(CUC)D
Pdr1p	tf	tE(UUC)C
Rox1p	tf	tE(UUC)E2
Rph1p	tf	tE(UUC)E3
Pho2p	tf	tE(UUC)J
Pdr3p	tf	tE(UUC)P
Pdr1p	tf	tE(UUC)P
Hap4p	tf	tF(GAA)B
Ste12p	tf	tF(GAA)D
Ste12p	tf	tF(GAA)H1
Ino4p	tf	tF(GAA)P2
Pdr1p	tf	tG(GCC)F2
Cin5p	tf	tG(GCC)F2
Pho2p	tf	tG(GCC)J1
Stp2p	tf	tG(GCC)J2
Mac1p	tf	tG(GCC)P2
Cin5p	tf	tG(UCC)G
Abf1p	tf	tG(UCC)G
Put3p	tf	tG(UCC)O
Zap1p	tf	tH(GUG)E1
Sum1p	tf	tH(GUG)E1
Gcr1p	tf	tH(GUG)E1
Gcr2p	tf	tH(GUG)E1
Ste12p	tf	tH(GUG)G2
Rox1p	tf	tH(GUG)G2
Mac1p	tf	tH(GUG)G2
Yap1p	tf	tH(GUG)K
Stp2p	tf	tH(GUG)K
Pdr1p	tf	tH(GUG)K
Ixr1p	tf	tH(GUG)K
Dal81p	tf	tH(GUG)K
Abf1p	tf	tK(CUU)D1
Put3p	tf	tK(CUU)G3
Rox1p	tf	tK(CUU)J
Hap2p	tf	tK(CUU)J
Gcr1p	tf	tK(CUU)J
Gcr1p	tf	tK(CUU)K
Hap4p	tf	tK(CUU)P
Swi4p	tf	tK(UUU)D
Pdr1p	tf	tK(UUU)D
Fzf1p	tf	tK(UUU)G1
Dal81p	tf	tK(UUU)L
Ste12p	tf	tL(CAA)A
Ste12p	tf	tL(CAA)D
Put3p	tf	tL(CAA)D
Sfl1p	tf	tL(CAA)G1
Rlm1p	tf	tL(CAA)G1
Abf1p	tf	tL(CAA)G2
Rap1p	tf	tL(CAA)G3
Stb5p	tf	tL(CAA)K
Rfx1p	tf	tL(CAA)L
Ste12p	tf	tL(CAA)M
Skn7p	tf	tL(GAG)G
Rph1p	tf	tL(UAA)B1
Ste12p	tf	tL(UAA)K
Rtg3p	tf	tL(UAG)L1
Swi5p	tf	tM(CAU)C
Pho2p	tf	tM(CAU)E
Reb1p	tf	tM(CAU)E
Rap1p	tf	tM(CAU)J1
Cin5p	tf	tM(CAU)J1
Rph1p	tf	tM(CAU)J2
Dal81p	tf	tM(CAU)M
Put3p	tf	tM(CAU)O2
Msn1p	tf	tM(CAU)O2
Gcn4p	tf	tM(CAU)P
Stp2p	tf	tN(GUU)F
Dal81p	tf	tN(GUU)L
Yap1p	tf	tP(UGG)L
Stp2p	tf	tP(UGG)M
Dal82p	tf	tP(UGG)N1
Yap5p	tf	tP(UGG)O1
Smp1p	tf	tP(UGG)O1
Pdr1p	tf	tP(UGG)O1
Fkh2p	tf	tP(UGG)O2
Yap1p	tf	tP(UGG)O3
Stp2p	tf	tQ(CUG)M
Ste12p	tf	tQ(UUG)D2
Reb1p	tf	tQ(UUG)E1
Fzf1p	tf	tQ(UUG)E1
Reb1p	tf	tQ(UUG)E2
Gcr1p	tf	tR(ACG)K
Rap1p	tf	tR(CCG)L
Stp2p	tf	tR(CCU)J
Reb1p	tf	tS(AGA)D1
Smp1p	tf	tS(AGA)D3
Pho4p	tf	tS(AGA)J
Rap1p	tf	tS(GCU)L
Yap1p	tf	tS(UGA)I
Rap1p	tf	tS(UGA)I
Pho2p	tf	tS(UGA)P
Met31p	tf	tT(AGU)B
Hap2p	tf	tT(AGU)B
Bas1p	tf	tT(AGU)B
Hap2p	tf	tT(AGU)H
Ste12p	tf	tT(AGU)J
Rme1p	tf	tT(AGU)J
Hap2p	tf	tT(AGU)J
Fzf1p	tf	tT(AGU)J
Dal81p	tf	tT(AGU)J
Arg80p	tf	tT(AGU)J
Aft1p	tf	tT(AGU)J
Gcr2p	tf	tT(AGU)J
Fkh2p	tf	tT(AGU)N1
Sum1p	tf	tT(UGU)G2
Rox1p	tf	tT(UGU)G2
Put3p	tf	tT(UGU)G2
Mac1p	tf	tT(UGU)G2
Msn1p	tf	tT(UGU)G2
Rox1p	tf	tT(UGU)P
Rme1p	tf	tT(UGU)P
Mac1p	tf	tT(UGU)P
Fkh2p	tf	tV(AAC)J
Dal81p	tf	tV(AAC)K1
Ste12p	tf	tV(AAC)K2
Stp2p	tf	tV(AAC)L
Dal81p	tf	tV(AAC)L
Stp2p	tf	tV(AAC)O
Pho2p	tf	tV(CAC)D
Yap1p	tf	tV(CAC)D
Sum1p	tf	tV(CAC)H
Gcr1p	tf	tV(CAC)H
Pho2p	tf	tV(UAC)D
Yap1p	tf	tW(CCA)G1
Rox1p	tf	tW(CCA)G1
Fkh2p	tf	tW(CCA)G1
Reb1p	tf	tW(CCA)G2
Mbp1p	tf	tW(CCA)G2
Hap3p	tf	tW(CCA)G2
Stp2p	tf	tW(CCA)J
Smp1p	tf	tW(CCA)J
Rph1p	tf	tW(CCA)J
Rox1p	tf	tW(CCA)J
Rfx1p	tf	tW(CCA)J
Mig1p	tf	tW(CCA)J
Met31p	tf	tW(CCA)J
Ixr1p	tf	tW(CCA)J
Dal81p	tf	tW(CCA)J
Rtg3p	tf	tW(CCA)K
Rtg1p	tf	tW(CCA)K
Rlm1p	tf	tW(CCA)K
Rme1p	tf	tW(CCA)M
Ixr1p	tf	tW(CCA)M
Dal81p	tf	tY(GUA)F1
Gcr2p	tf	tY(GUA)J2
Swi4p	tf	tY(GUA)O
Zap1p	tf	YAL001C
Yap1p	tf	YAL002W
Mbp1p	tf	YAL002W
Yap1p	tf	YAL003W
Ste12p	tf	YAL003W
Stb5p	tf	YAL003W
Sko1p	tf	YAL003W
Skn7p	tf	YAL003W
Rap1p	tf	YAL003W
Pho4p	tf	YAL003W
Pdr3p	tf	YAL003W
Pdr1p	tf	YAL003W
Msn4p	tf	YAL003W
Msn2p	tf	YAL003W
Hsf1p	tf	YAL003W
Fkh2p	tf	YAL003W
Phd1p	tf	YAL003W
Ste12p	tf	YAL004W
Rme1p	tf	YAL004W
Rim101p	tf	YAL004W
Hsf1p	tf	YAL004W
Hot1p	tf	YAL005C
Yap1p	tf	YAL005C
Ste12p	tf	YAL005C
Sko1p	tf	YAL005C
Skn7p	tf	YAL005C
Rap1p	tf	YAL005C
Pho4p	tf	YAL005C
Msn4p	tf	YAL005C
Msn2p	tf	YAL005C
Hsf1p	tf	YAL005C
Fkh2p	tf	YAL005C
Phd1p	tf	YAL005C
Ste12p	tf	YAL007C
Tye7p	tf	YAL007C
Sip4p	tf	YAL010C
Rap1p	tf	YAL011W
Mig1p	tf	YAL011W
Cad1p	tf	YAL011W
Yap1p	tf	YAL012W
Xbp1p	tf	YAL012W
Mig1p	tf	YAL012W
Met4p	tf	YAL012W
Met32p	tf	YAL012W
Met31p	tf	YAL012W
Gat1p	tf	YAL012W
Cbf1p	tf	YAL012W
Met28p	tf	YAL012W
Yap6p	tf	YAL013W
Met31p	tf	YAL013W
Hsf1p	tf	YAL013W
Gat1p	tf	YAL013W
Cin5p	tf	YAL013W
Gat1p	tf	YAL014C
Yap1p	tf	YAL015C
Rox1p	tf	YAL016W
Pip2p	tf	YAL016W
Oaf1p	tf	YAL016W
Met32p	tf	YAL016W
Yox1p	tf	YAL016W
Swi5p	tf	YAL017W
Nrg1p	tf	YAL017W
Fzf1p	tf	YAL017W
Cbf1p	tf	YAL017W
Arr1p	tf	YAL017W
Aft1p	tf	YAL017W
Abf1p	tf	YAL017W
Swi5p	tf	YAL018C
Rap1p	tf	YAL018C
Nrg1p	tf	YAL018C
Fzf1p	tf	YAL018C
Cbf1p	tf	YAL018C
Arr1p	tf	YAL018C
Aft1p	tf	YAL018C
Adr1p	tf	YAL018C
Sum1p	tf	YAL019W
Ste12p	tf	YAL019W
Gat1p	tf	YAL019W
Gat1p	tf	YAL020C
Yap6p	tf	YAL022C
Swi5p	tf	YAL022C
Smp1p	tf	YAL022C
Pdr1p	tf	YAL022C
Nrg1p	tf	YAL022C
Mcm1p	tf	YAL022C
Mac1p	tf	YAL022C
Fzf1p	tf	YAL022C
Aft2p	tf	YAL022C
Adr1p	tf	YAL022C
Sum1p	tf	YAL023C
Mcm1p	tf	YAL023C
Abf1p	tf	YAL023C
Phd1p	tf	YAL023C
Swi4p	tf	YAL024C
Fkh2p	tf	YAL024C
Cbf1p	tf	YAL024C
Yap6p	tf	YAL025C
Dal80p	tf	YAL025C
Ste12p	tf	YAL026C
Cbf1p	tf	YAL026C
Rim101p	tf	YAL027W
Ino4p	tf	YAL027W
Ecm22p	tf	YAL027W
Mga1p	tf	YAL027W
Tec1p	tf	YAL028W
Ste12p	tf	YAL028W
Fkh2p	tf	YAL028W
Crz1p	tf	YAL028W
Tec1p	tf	YAL029C
Ste12p	tf	YAL029C
Rtg3p	tf	YAL029C
Rtg1p	tf	YAL029C
Fkh2p	tf	YAL029C
Xbp1p	tf	YAL030W
Reb1p	tf	YAL030W
Aft1p	tf	YAL030W
Reb1p	tf	YAL031C
Aft1p	tf	YAL031C
Xbp1p	tf	YAL032C
Rfx1p	tf	YAL032C
Rap1p	tf	YAL033W
Rap1p	tf	YAL034C
Pip2p	tf	YAL034W-A
Oaf1p	tf	YAL034W-A
Met32p	tf	YAL034W-A
Pip2p	tf	YAL035W
Oaf1p	tf	YAL035W
Met32p	tf	YAL035W
Yox1p	tf	YAL035W
Pip2p	tf	YAL036C
Oaf1p	tf	YAL036C
Met32p	tf	YAL036C
Yox1p	tf	YAL036C
Dal81p	tf	YAL037C-A
Cin5p	tf	YAL037C-A
Mig1p	tf	YAL037W
Dal81p	tf	YAL037W
Cin5p	tf	YAL037W
Cad1p	tf	YAL037W
Azf1p	tf	YAL037W
Mga1p	tf	YAL037W
Tec1p	tf	YAL038W
Ste12p	tf	YAL038W
Skn7p	tf	YAL038W
Rox1p	tf	YAL038W
Rap1p	tf	YAL038W
Pho4p	tf	YAL038W
Msn2p	tf	YAL038W
Mcm1p	tf	YAL038W
Ino4p	tf	YAL038W
Gsm1p	tf	YAL038W
Gcr1p	tf	YAL038W
Cin5p	tf	YAL038W
Gcr2p	tf	YAL038W
Phd1p	tf	YAL038W
Tye7p	tf	YAL038W
Tec1p	tf	YAL039C
Ste12p	tf	YAL039C
Sko1p	tf	YAL039C
Rap1p	tf	YAL039C
Pho4p	tf	YAL039C
Mcm1p	tf	YAL039C
Ino4p	tf	YAL039C
Hap1p	tf	YAL039C
Gcr1p	tf	YAL039C
Phd1p	tf	YAL039C
Xbp1p	tf	YAL040C
Tec1p	tf	YAL040C
Swi5p	tf	YAL040C
Swi4p	tf	YAL040C
Ste12p	tf	YAL040C
Sko1p	tf	YAL040C
Rap1p	tf	YAL040C
Pho4p	tf	YAL040C
Mcm1p	tf	YAL040C
Mbp1p	tf	YAL040C
Hcm1p	tf	YAL040C
Gln3p	tf	YAL040C
Flo8p	tf	YAL040C
Azf1p	tf	YAL040C
Ash1p	tf	YAL040C
Ace2p	tf	YAL040C
Phd1p	tf	YAL040C
Tec1p	tf	YAL041W
Ste12p	tf	YAL041W
Abf1p	tf	YAL041W
Cup9p	tf	YAL041W
Abf1p	tf	YAL042W
Ste12p	tf	YAL043C
Abf1p	tf	YAL043C
Yap6p	tf	YAL044C
Yap5p	tf	YAL044C
Cin5p	tf	YAL044C
Cad1p	tf	YAL044C
Bas1p	tf	YAL044C
Bas1p	tf	YAL045C
Bas1p	tf	YAL046C
Yox1p	tf	YAL047C
Ino2p	tf	YAL048C
Gal4p	tf	YAL049C
Rap1p	tf	YAL051W
Yap5p	tf	YAL053W
Ume6p	tf	YAL053W
Ste12p	tf	YAL053W
Rap1p	tf	YAL053W
Ino4p	tf	YAL053W
Fkh2p	tf	YAL053W
Cbf1p	tf	YAL053W
Bas1p	tf	YAL053W
Abf1p	tf	YAL053W
Yap5p	tf	YAL054C
Ume6p	tf	YAL054C
Ste12p	tf	YAL054C
Rap1p	tf	YAL054C
Pho4p	tf	YAL054C
Ino4p	tf	YAL054C
Fkh2p	tf	YAL054C
Cin5p	tf	YAL054C
Cbf1p	tf	YAL054C
Cat8p	tf	YAL054C
Adr1p	tf	YAL054C
Abf1p	tf	YAL054C
Yox1p	tf	YAL058W
Adr1p	tf	YAL059W
Yap5p	tf	YAL060W
Ste12p	tf	YAL060W
Sko1p	tf	YAL060W
Nrg1p	tf	YAL060W
Msn2p	tf	YAL060W
Bas1p	tf	YAL060W
Tye7p	tf	YAL060W
Hot1p	tf	YAL061W
Ste12p	tf	YAL061W
Sko1p	tf	YAL061W
Rtg3p	tf	YAL061W
Pdr3p	tf	YAL061W
Pdr1p	tf	YAL061W
Cin5p	tf	YAL061W
Swi5p	tf	YAL062W
Ste12p	tf	YAL062W
Skn7p	tf	YAL062W
Rtg3p	tf	YAL062W
Mbp1p	tf	YAL062W
Cad1p	tf	YAL062W
Arr1p	tf	YAL062W
Ace2p	tf	YAL062W
Yox1p	tf	YAL062W
Yap6p	tf	YAL063C
Swi5p	tf	YAL063C
Ste12p	tf	YAL063C
Smp1p	tf	YAL063C
Skn7p	tf	YAL063C
Rim101p	tf	YAL063C
Nrg1p	tf	YAL063C
Msn4p	tf	YAL063C
Msn2p	tf	YAL063C
Mbp1p	tf	YAL063C
Flo8p	tf	YAL063C
Dal82p	tf	YAL063C
Cin5p	tf	YAL063C
Cad1p	tf	YAL063C
Phd1p	tf	YAL063C
Yox1p	tf	YAL063C
Yap6p	tf	YAL064C-A
Swi4p	tf	YAL064C-A
Ste12p	tf	YAL064C-A
Rim101p	tf	YAL064C-A
Rap1p	tf	YAL064C-A
Nrg1p	tf	YAL064C-A
Ixr1p	tf	YAL064C-A
Ino4p	tf	YAL064C-A
Flo8p	tf	YAL064C-A
Mga1p	tf	YAL064C-A
Phd1p	tf	YAL064C-A
Swi4p	tf	YAL064W
Ste12p	tf	YAL064W
Stb5p	tf	YAL064W
Sko1p	tf	YAL064W
Skn7p	tf	YAL064W
Rap1p	tf	YAL064W
Nrg1p	tf	YAL064W
Ixr1p	tf	YAL064W
Ino4p	tf	YAL064W
Flo8p	tf	YAL064W
Dal82p	tf	YAL064W
Mga1p	tf	YAL064W
Phd1p	tf	YAL064W
Smp1p	tf	YAL065C
Rim101p	tf	YAL065C
Rim101p	tf	YAL067C
Msn4p	tf	YAL067C
Smp1p	tf	YAL068C
Rim101p	tf	YAL068C
Rap1p	tf	YAL068C
Gal4p	tf	YAR002C-A
Ste12p	tf	YAR002W
Pdr1p	tf	YAR002W
Gal4p	tf	YAR002W
Zap1p	tf	YAR003W
Mac1p	tf	YAR003W
Gal4p	tf	YAR003W
Gcr2p	tf	YAR003W
Yap5p	tf	YAR007C
Mbp1p	tf	YAR007C
Gal4p	tf	YAR007C
Yhp1p	tf	YAR007C
Mbp1p	tf	YAR008W
Gal4p	tf	YAR008W
Yhp1p	tf	YAR008W
Yap5p	tf	YAR009C
Yap3p	tf	YAR009C
Swi5p	tf	YAR009C
Ste12p	tf	YAR009C
Rox1p	tf	YAR009C
Mig2p	tf	YAR009C
Met31p	tf	YAR009C
Mac1p	tf	YAR009C
Hcm1p	tf	YAR009C
Gcr1p	tf	YAR009C
Azf1p	tf	YAR009C
Yhp1p	tf	YAR009C
Yox1p	tf	YAR009C
Tec1p	tf	YAR010C
Yap5p	tf	YAR014C
Tec1p	tf	YAR014C
Ste12p	tf	YAR014C
Pho2p	tf	YAR015W
Yap6p	tf	YAR015W
Yap5p	tf	YAR015W
Tec1p	tf	YAR015W
Ste12p	tf	YAR015W
Cin5p	tf	YAR015W
Cad1p	tf	YAR015W
Bas1p	tf	YAR015W
Mcm1p	tf	YAR018C
Fkh2p	tf	YAR018C
Yhp1p	tf	YAR018C
Yox1p	tf	YAR018C
Pho4p	tf	YAR019C
Hcm1p	tf	YAR019C
Fkh2p	tf	YAR019C
Ste12p	tf	YAR020C
Ste12p	tf	YAR023C
Sfl1p	tf	YAR023C
Mbp1p	tf	YAR023C
Yox1p	tf	YAR023C
Ste12p	tf	YAR027W
Mbp1p	tf	YAR027W
Yox1p	tf	YAR027W
Rox1p	tf	YAR028W
Phd1p	tf	YAR028W
Yap5p	tf	YAR029W
Rap1p	tf	YAR029W
Nrg1p	tf	YAR029W
Ecm22p	tf	YAR029W
Uga3p	tf	YAR031W
Nrg1p	tf	YAR031W
Phd1p	tf	YAR033W
Swi4p	tf	YAR035W
Ste12p	tf	YAR035W
Rap1p	tf	YAR035W
Cin5p	tf	YAR035W
Yap6p	tf	YAR042W
Uga3p	tf	YAR042W
Ste12p	tf	YAR042W
Rph1p	tf	YAR042W
Nrg1p	tf	YAR042W
Mac1p	tf	YAR042W
Hcm1p	tf	YAR042W
Phd1p	tf	YAR042W
Yap5p	tf	YAR047C
Ste12p	tf	YAR047C
Skn7p	tf	YAR047C
Rme1p	tf	YAR047C
Gcn4p	tf	YAR047C
Yap6p	tf	YAR050W
Yap5p	tf	YAR050W
Ste12p	tf	YAR050W
Skn7p	tf	YAR050W
Rme1p	tf	YAR050W
Rim101p	tf	YAR050W
Put3p	tf	YAR050W
Gcn4p	tf	YAR050W
Flo8p	tf	YAR050W
Arg81p	tf	YAR050W
Adr1p	tf	YAR050W
Mga1p	tf	YAR050W
Phd1p	tf	YAR050W
Ste12p	tf	YAR053W
Rtg1p	tf	YAR053W
Rlm1p	tf	YAR053W
Hap3p	tf	YAR053W
Gln3p	tf	YAR053W
Gcn4p	tf	YAR053W
Flo8p	tf	YAR061W
Phd1p	tf	YAR061W
Phd1p	tf	YAR062W
Yox1p	tf	YAR062W
Ste12p	tf	YAR064W
Mcm1p	tf	YAR064W
Hcm1p	tf	YAR064W
Ecm22p	tf	YAR064W
Yap5p	tf	YAR066W
Smp1p	tf	YAR066W
Msn4p	tf	YAR066W
Smp1p	tf	YAR068W
Rox1p	tf	YAR068W
Mac1p	tf	YAR069C
Nrg1p	tf	YAR070C
Fkh2p	tf	YAR070C
Fkh1p	tf	YAR070C
Tec1p	tf	YAR071W
Ste12p	tf	YAR071W
Sko1p	tf	YAR071W
Nrg1p	tf	YAR071W
Fkh2p	tf	YAR071W
Tye7p	tf	YAR073W
Swi4p	tf	YAR075W
Rap1p	tf	YAR075W
Smp1p	tf	YBL001C
Pdr1p	tf	YBL001C
Mcm1p	tf	YBL001C
Ino4p	tf	YBL001C
Hap5p	tf	YBL001C
Hap4p	tf	YBL001C
Hap3p	tf	YBL001C
Hap2p	tf	YBL001C
Ecm22p	tf	YBL001C
Gcr2p	tf	YBL001C
Thi2p	tf	YBL001C
Tye7p	tf	YBL001C
Swi4p	tf	YBL002W
Stp2p	tf	YBL002W
Sko1p	tf	YBL002W
Met31p	tf	YBL002W
Mbp1p	tf	YBL002W
Swi4p	tf	YBL003C
Ste12p	tf	YBL003C
Sko1p	tf	YBL003C
Mbp1p	tf	YBL003C
Tec1p	tf	YBL004W
Ste12p	tf	YBL004W
Sko1p	tf	YBL004W
Pdr3p	tf	YBL004W
Ixr1p	tf	YBL004W
Ste12p	tf	YBL005W
Rph1p	tf	YBL005W
Pdr3p	tf	YBL005W
Pdr1p	tf	YBL005W
Hsf1p	tf	YBL005W
Yap5p	tf	YBL005W-A
Pdr3p	tf	YBL005W-A
Pdr3p	tf	YBL005W-B
Pdr1p	tf	YBL005W-B
Cin5p	tf	YBL005W-B
Ste12p	tf	YBL006C
Pdr3p	tf	YBL006C
Pdr1p	tf	YBL006C
Pdr3p	tf	YBL007C
Abf1p	tf	YBL007C
Cad1p	tf	YBL008W
Cad1p	tf	YBL009W
Tec1p	tf	YBL011W
Ste12p	tf	YBL011W
Reb1p	tf	YBL011W
Rap1p	tf	YBL011W
Pdr3p	tf	YBL011W
Leu3p	tf	YBL011W
Hsf1p	tf	YBL011W
Hap5p	tf	YBL011W
Phd1p	tf	YBL011W
Ste12p	tf	YBL013W
Reb1p	tf	YBL013W
Rap1p	tf	YBL013W
Aft1p	tf	YBL013W
Tec1p	tf	YBL014C
Ste12p	tf	YBL014C
Reb1p	tf	YBL014C
Rap1p	tf	YBL014C
Aft1p	tf	YBL014C
Ume6p	tf	YBL015W
Ste12p	tf	YBL015W
Gsm1p	tf	YBL015W
Flo8p	tf	YBL015W
Mga1p	tf	YBL015W
Tec1p	tf	YBL016W
Ste12p	tf	YBL016W
Tye7p	tf	YBL016W
Tec1p	tf	YBL017C
Ste12p	tf	YBL017C
Tye7p	tf	YBL017C
Mac1p	tf	YBL018C
Ixr1p	tf	YBL018C
Dal80p	tf	YBL018C
Ino4p	tf	YBL019W
Rap1p	tf	YBL020W
Gat1p	tf	YBL020W
Arg80p	tf	YBL020W
Rap1p	tf	YBL021C
Rpn4p	tf	YBL022C
Rap1p	tf	YBL022C
Mbp1p	tf	YBL022C
Tye7p	tf	YBL022C
Swi4p	tf	YBL023C
Rpn4p	tf	YBL023C
Mbp1p	tf	YBL023C
Hcm1p	tf	YBL023C
Ace2p	tf	YBL023C
Sko1p	tf	YBL024W
Phd1p	tf	YBL025W
Ste12p	tf	YBL026W
Skn7p	tf	YBL026W
Rme1p	tf	YBL026W
Mcm1p	tf	YBL026W
Phd1p	tf	YBL026W
Yap6p	tf	YBL027W
Yap1p	tf	YBL027W
Tec1p	tf	YBL027W
Ste12p	tf	YBL027W
Rap1p	tf	YBL027W
Flo8p	tf	YBL027W
Yap6p	tf	YBL028C
Yap1p	tf	YBL028C
Tec1p	tf	YBL028C
Rap1p	tf	YBL028C
Pdr1p	tf	YBL028C
Flo8p	tf	YBL028C
Yap6p	tf	YBL029C-A
Tec1p	tf	YBL029C-A
Swi4p	tf	YBL029C-A
Ste12p	tf	YBL029C-A
Sko1p	tf	YBL029C-A
Skn7p	tf	YBL029C-A
Rap1p	tf	YBL029C-A
Nrg1p	tf	YBL029C-A
Msn2p	tf	YBL029C-A
Ixr1p	tf	YBL029C-A
Flo8p	tf	YBL029C-A
Fkh2p	tf	YBL029C-A
Cin5p	tf	YBL029C-A
Cad1p	tf	YBL029C-A
Msn1p	tf	YBL029C-A
Phd1p	tf	YBL029C-A
Rds2p	tf	YBL029W
Yap6p	tf	YBL029W
Xbp1p	tf	YBL029W
Tec1p	tf	YBL029W
Swi4p	tf	YBL029W
Ste12p	tf	YBL029W
Sko1p	tf	YBL029W
Skn7p	tf	YBL029W
Rox1p	tf	YBL029W
Rim101p	tf	YBL029W
Rap1p	tf	YBL029W
Pdr3p	tf	YBL029W
Pdr1p	tf	YBL029W
Nrg1p	tf	YBL029W
Msn2p	tf	YBL029W
Met31p	tf	YBL029W
Ixr1p	tf	YBL029W
Gcr1p	tf	YBL029W
Gal4p	tf	YBL029W
Fkh2p	tf	YBL029W
Dal81p	tf	YBL029W
Cin5p	tf	YBL029W
Cad1p	tf	YBL029W
Bas1p	tf	YBL029W
Azf1p	tf	YBL029W
Arg81p	tf	YBL029W
Aro80p	tf	YBL029W
Cup9p	tf	YBL029W
Msn1p	tf	YBL029W
Phd1p	tf	YBL029W
Rds2p	tf	YBL030C
Yap6p	tf	YBL030C
Tec1p	tf	YBL030C
Swi4p	tf	YBL030C
Ste12p	tf	YBL030C
Skn7p	tf	YBL030C
Rox1p	tf	YBL030C
Rap1p	tf	YBL030C
Nrg1p	tf	YBL030C
Ixr1p	tf	YBL030C
Hap4p	tf	YBL030C
Flo8p	tf	YBL030C
Cin5p	tf	YBL030C
Azf1p	tf	YBL030C
Ash1p	tf	YBL030C
Cup9p	tf	YBL030C
Mga1p	tf	YBL030C
Phd1p	tf	YBL030C
Fkh2p	tf	YBL031W
Yox1p	tf	YBL031W
Yap1p	tf	YBL032W
Skn7p	tf	YBL032W
Hsf1p	tf	YBL032W
Hcm1p	tf	YBL032W
Fkh2p	tf	YBL032W
Yap1p	tf	YBL033C
Ste12p	tf	YBL033C
Skn7p	tf	YBL033C
Put3p	tf	YBL033C
Hsf1p	tf	YBL033C
Hcm1p	tf	YBL033C
Fkh2p	tf	YBL033C
Abf1p	tf	YBL033C
Leu3p	tf	YBL034C
Cad1p	tf	YBL034C
Mbp1p	tf	YBL035C
Aft1p	tf	YBL036C
Yox1p	tf	YBL036C
Tec1p	tf	YBL037W
Ste12p	tf	YBL037W
Smp1p	tf	YBL037W
Rfx1p	tf	YBL037W
Ste12p	tf	YBL038W
Smp1p	tf	YBL038W
Abf1p	tf	YBL038W
Ste12p	tf	YBL039C
Sko1p	tf	YBL039C
Mss11p	tf	YBL039C
Abf1p	tf	YBL039C
Tec1p	tf	YBL041W
Ste12p	tf	YBL041W
Rap1p	tf	YBL041W
Pdr3p	tf	YBL041W
Dal81p	tf	YBL041W
Cha4p	tf	YBL041W
Msn1p	tf	YBL041W
Phd1p	tf	YBL041W
Tec1p	tf	YBL042C
Ste12p	tf	YBL042C
Rap1p	tf	YBL042C
Pdr3p	tf	YBL042C
Dal81p	tf	YBL042C
Abf1p	tf	YBL042C
Msn1p	tf	YBL042C
Phd1p	tf	YBL042C
Yap6p	tf	YBL043W
Yap5p	tf	YBL043W
Yap1p	tf	YBL043W
Xbp1p	tf	YBL043W
Tec1p	tf	YBL043W
Ste12p	tf	YBL043W
Rtg3p	tf	YBL043W
Rap1p	tf	YBL043W
Pdr3p	tf	YBL043W
Nrg1p	tf	YBL043W
Ino4p	tf	YBL043W
Hap5p	tf	YBL043W
Hap2p	tf	YBL043W
Gcn4p	tf	YBL043W
Cin5p	tf	YBL043W
Ash1p	tf	YBL043W
Cup9p	tf	YBL043W
Yap6p	tf	YBL044W
Yap1p	tf	YBL044W
Tec1p	tf	YBL044W
Ste12p	tf	YBL044W
Rap1p	tf	YBL044W
Nrg1p	tf	YBL044W
Hap5p	tf	YBL044W
Hap4p	tf	YBL044W
Hap3p	tf	YBL044W
Hap2p	tf	YBL044W
Hap1p	tf	YBL044W
Gcn4p	tf	YBL044W
Cin5p	tf	YBL044W
Cup9p	tf	YBL044W
Mga1p	tf	YBL044W
Yap1p	tf	YBL045C
Tec1p	tf	YBL045C
Ste12p	tf	YBL045C
Hap5p	tf	YBL045C
Hap4p	tf	YBL045C
Hap3p	tf	YBL045C
Hap2p	tf	YBL045C
Hap1p	tf	YBL045C
Gcn4p	tf	YBL045C
Mga1p	tf	YBL045C
Aft1p	tf	YBL046W
Mac1p	tf	YBL047C
Aft1p	tf	YBL047C
Yap5p	tf	YBL048W
Ste12p	tf	YBL049W
Rap1p	tf	YBL049W
Ste12p	tf	YBL050W
Rap1p	tf	YBL050W
Aft1p	tf	YBL050W
Yox1p	tf	YBL050W
Aft1p	tf	YBL051C
Yox1p	tf	YBL051C
Reb1p	tf	YBL052C
Rap1p	tf	YBL052C
Rap1p	tf	YBL053W
Sko1p	tf	YBL054W
Rap1p	tf	YBL054W
Ixr1p	tf	YBL054W
Ino4p	tf	YBL054W
Cin5p	tf	YBL054W
Yap6p	tf	YBL055C
Reb1p	tf	YBL055C
Ixr1p	tf	YBL055C
Fkh1p	tf	YBL056W
Crz1p	tf	YBL056W
Mga1p	tf	YBL056W
Yox1p	tf	YBL056W
Mig1p	tf	YBL057C
Fkh1p	tf	YBL057C
Crz1p	tf	YBL057C
Mga1p	tf	YBL057C
Yox1p	tf	YBL057C
Reb1p	tf	YBL058W
Aft1p	tf	YBL058W
Reb1p	tf	YBL059C-A
Ino4p	tf	YBL059C-A
Aft1p	tf	YBL059C-A
Ste12p	tf	YBL059W
Rph1p	tf	YBL059W
Reb1p	tf	YBL059W
Msn4p	tf	YBL059W
Msn2p	tf	YBL059W
Mcm1p	tf	YBL059W
Ino4p	tf	YBL059W
Dal82p	tf	YBL059W
Dal80p	tf	YBL059W
Mga1p	tf	YBL059W
Ste12p	tf	YBL060W
Rap1p	tf	YBL060W
Ste12p	tf	YBL061C
Rap1p	tf	YBL061C
Ume6p	tf	YBL063W
Ste12p	tf	YBL063W
Put3p	tf	YBL063W
Ume6p	tf	YBL064C
Ste12p	tf	YBL064C
Sko1p	tf	YBL064C
Rap1p	tf	YBL064C
Put3p	tf	YBL064C
Cad1p	tf	YBL064C
Ste12p	tf	YBL067C
Swi5p	tf	YBL069W
Ino4p	tf	YBL069W
Adr1p	tf	YBL070C
Rap1p	tf	YBL071C
Hcm1p	tf	YBL071C
Yhp1p	tf	YBL071C
Rap1p	tf	YBL071C-B
Skn7p	tf	YBL071W-A
Rap1p	tf	YBL071W-A
Ste12p	tf	YBL072C
Rap1p	tf	YBL072C
Rgt1p	tf	YBL073W
Hsf1p	tf	YBL073W
Gcr1p	tf	YBL073W
Azf1p	tf	YBL073W
War1p	tf	YBL074C
Ste12p	tf	YBL074C
Rgt1p	tf	YBL074C
Mss11p	tf	YBL074C
Yap5p	tf	YBL075C
Ste12p	tf	YBL075C
Rap1p	tf	YBL075C
Hsf1p	tf	YBL075C
Yhp1p	tf	YBL075C
Yox1p	tf	YBL075C
Reb1p	tf	YBL076C
Hsf1p	tf	YBL076C
Gcn4p	tf	YBL076C
Ume6p	tf	YBL077W
Ume6p	tf	YBL078C
Mss11p	tf	YBL078C
Ino4p	tf	YBL078C
Fkh2p	tf	YBL078C
Ecm22p	tf	YBL078C
Ste12p	tf	YBL079W
Rtg3p	tf	YBL079W
Gcr1p	tf	YBL079W
Abf1p	tf	YBL079W
Abf1p	tf	YBL080C
Rap1p	tf	YBL081W
Fkh1p	tf	YBL081W
Rap1p	tf	YBL082C
Fkh1p	tf	YBL082C
Fkh1p	tf	YBL083C
Ste12p	tf	YBL085W
Arg81p	tf	YBL085W
Rap1p	tf	YBL086C
Yap6p	tf	YBL087C
Smp1p	tf	YBL087C
Rpn4p	tf	YBL087C
Rap1p	tf	YBL087C
Pdr1p	tf	YBL087C
Mss11p	tf	YBL087C
Met32p	tf	YBL087C
Ixr1p	tf	YBL087C
Rap1p	tf	YBL088C
Pip2p	tf	YBL089W
Oaf1p	tf	YBL089W
Yhp1p	tf	YBL090W
Yhp1p	tf	YBL091C
Ste12p	tf	YBL092W
Rap1p	tf	YBL092W
Mcm1p	tf	YBL092W
Hcm1p	tf	YBL092W
Rap1p	tf	YBL093C
Mcm1p	tf	YBL093C
Hcm1p	tf	YBL093C
Xbp1p	tf	YBL095W
Rtg1p	tf	YBL097W
Fkh2p	tf	YBL097W
Fkh1p	tf	YBL097W
Yap6p	tf	YBL098W
Yap5p	tf	YBL098W
Rtg1p	tf	YBL098W
Fkh2p	tf	YBL098W
Cad1p	tf	YBL098W
Tye7p	tf	YBL098W
Yhp1p	tf	YBL098W
Tec1p	tf	YBL099W
Ste12p	tf	YBL099W
Sko1p	tf	YBL099W
Skn7p	tf	YBL099W
Hap5p	tf	YBL099W
Hap4p	tf	YBL099W
Hap3p	tf	YBL099W
Hap2p	tf	YBL099W
Cin5p	tf	YBL100W-B
Ste12p	tf	YBL101C
Mbp1p	tf	YBL101W-B
Ste12p	tf	YBL101W-C
Pdr3p	tf	YBL102W
Gcn4p	tf	YBL102W
Pdr3p	tf	YBL103C
Gcn4p	tf	YBL103C
Stp1p	tf	YBL104C
Msn4p	tf	YBL104C
Gat1p	tf	YBL104C
Ste12p	tf	YBL106C
Ino4p	tf	YBL106C
Yap5p	tf	YBL107C
Ste12p	tf	YBL107C
Flo8p	tf	YBL107C
Mga1p	tf	YBL107C
Thi2p	tf	YBL107C
Ste12p	tf	YBL107W-A
Gcr1p	tf	YBL107W-A
Yap5p	tf	YBL108C-A
Ste12p	tf	YBL108C-A
Smp1p	tf	YBL108C-A
Sko1p	tf	YBL108C-A
Mga1p	tf	YBL108C-A
Swi5p	tf	YBL108W
Swi4p	tf	YBL108W
Rap1p	tf	YBL108W
Msn4p	tf	YBL108W
Mbp1p	tf	YBL108W
Phd1p	tf	YBL108W
Yhp1p	tf	YBL108W
Yap6p	tf	YBL109W
Zap1p	tf	YBL109W
Yap5p	tf	YBL109W
Uga3p	tf	YBL109W
Swi5p	tf	YBL109W
Swi4p	tf	YBL109W
Stp1p	tf	YBL109W
Ste12p	tf	YBL109W
Smp1p	tf	YBL109W
Rox1p	tf	YBL109W
Rap1p	tf	YBL109W
Pdr1p	tf	YBL109W
Msn4p	tf	YBL109W
Mbp1p	tf	YBL109W
Hap4p	tf	YBL109W
Gal4p	tf	YBL109W
Dal80p	tf	YBL109W
Crz1p	tf	YBL109W
Phd1p	tf	YBL109W
Yap6p	tf	YBL111C
Zap1p	tf	YBL111C
Yap5p	tf	YBL111C
Uga3p	tf	YBL111C
Swi5p	tf	YBL111C
Swi4p	tf	YBL111C
Stp1p	tf	YBL111C
Rox1p	tf	YBL111C
Rap1p	tf	YBL111C
Pdr1p	tf	YBL111C
Mbp1p	tf	YBL111C
Hap4p	tf	YBL111C
Gal4p	tf	YBL111C
Dal80p	tf	YBL111C
Cin5p	tf	YBL111C
Phd1p	tf	YBL111C
Yap6p	tf	YBL112C
Yap5p	tf	YBL112C
Uga3p	tf	YBL112C
Swi5p	tf	YBL112C
Stp1p	tf	YBL112C
Rox1p	tf	YBL112C
Pdr1p	tf	YBL112C
Gal4p	tf	YBL112C
Dal80p	tf	YBL112C
Yap6p	tf	YBL113C
Yap5p	tf	YBL113C
Uga3p	tf	YBL113C
Swi5p	tf	YBL113C
Rox1p	tf	YBL113C
Pdr1p	tf	YBL113C
Gal4p	tf	YBL113C
Dal80p	tf	YBL113C
Dal82p	tf	YBR002C
Yox1p	tf	YBR002C
Dal82p	tf	YBR003W
Yox1p	tf	YBR003W
Cin5p	tf	YBR004C
Yap6p	tf	YBR005W
Xbp1p	tf	YBR005W
Rfx1p	tf	YBR005W
Yap6p	tf	YBR006W
Yap5p	tf	YBR006W
Yap5p	tf	YBR007C
Tec1p	tf	YBR007C
Swi4p	tf	YBR007C
Ste12p	tf	YBR007C
Mbp1p	tf	YBR007C
Ixr1p	tf	YBR007C
Ino4p	tf	YBR007C
Hcm1p	tf	YBR007C
Hap5p	tf	YBR007C
Gat1p	tf	YBR007C
Cin5p	tf	YBR007C
Yrm1p	tf	YBR008C
Yrr1p	tf	YBR008C
Yap1p	tf	YBR008C
Ste12p	tf	YBR008C
Sko1p	tf	YBR008C
Pdr1p	tf	YBR008C
Ixr1p	tf	YBR008C
Cin5p	tf	YBR008C
Cad1p	tf	YBR008C
Ste12p	tf	YBR009C
Hsf1p	tf	YBR009C
Fkh2p	tf	YBR009C
Ste12p	tf	YBR010W
Fkh2p	tf	YBR010W
Tec1p	tf	YBR011C
Ste12p	tf	YBR011C
Rap1p	tf	YBR011C
Met4p	tf	YBR011C
Abf1p	tf	YBR011C
Met28p	tf	YBR011C
Msn4p	tf	YBR012C
Msn2p	tf	YBR012C
Mot3p	tf	YBR012C
Tec1p	tf	YBR012W-A
Tec1p	tf	YBR012W-B
Yap1p	tf	YBR013C
Sko1p	tf	YBR013C
Msn4p	tf	YBR013C
Msn2p	tf	YBR013C
Mot3p	tf	YBR013C
Ste12p	tf	YBR014C
Sko1p	tf	YBR014C
Hap3p	tf	YBR014C
Skn7p	tf	YBR015C
Hap1p	tf	YBR015C
Gal4p	tf	YBR015C
Skn7p	tf	YBR016W
Hap1p	tf	YBR016W
Gal4p	tf	YBR016W
Sum1p	tf	YBR017C
Gal4p	tf	YBR017C
Uga3p	tf	YBR018C
Stp1p	tf	YBR018C
Nrg1p	tf	YBR018C
Gal4p	tf	YBR018C
Ste12p	tf	YBR019C
Reb1p	tf	YBR019C
Pip2p	tf	YBR019C
Oaf1p	tf	YBR019C
Nrg1p	tf	YBR019C
Met32p	tf	YBR019C
Gal4p	tf	YBR019C
Dal81p	tf	YBR019C
Msn1p	tf	YBR019C
Stp2p	tf	YBR020W
Ste12p	tf	YBR020W
Reb1p	tf	YBR020W
Pip2p	tf	YBR020W
Oaf1p	tf	YBR020W
Nrg1p	tf	YBR020W
Mig1p	tf	YBR020W
Met32p	tf	YBR020W
Met31p	tf	YBR020W
Gal4p	tf	YBR020W
Msn1p	tf	YBR020W
Tec1p	tf	YBR021W
Gal4p	tf	YBR021W
Msn1p	tf	YBR021W
Gal4p	tf	YBR022W
Ste12p	tf	YBR023C
Yap6p	tf	YBR024W
Ste12p	tf	YBR024W
Rap1p	tf	YBR024W
Gal4p	tf	YBR024W
Yap6p	tf	YBR025C
Yap1p	tf	YBR025C
Xbp1p	tf	YBR025C
Sko1p	tf	YBR025C
Rfx1p	tf	YBR025C
Hap5p	tf	YBR025C
Hap4p	tf	YBR025C
Hap3p	tf	YBR025C
Hap2p	tf	YBR025C
Cin5p	tf	YBR025C
Bas1p	tf	YBR025C
Adr1p	tf	YBR026C
Ino4p	tf	YBR028C
Arg80p	tf	YBR028C
Ste12p	tf	YBR029C
Ino4p	tf	YBR029C
Ino2p	tf	YBR029C
Fkh1p	tf	YBR029C
Abf1p	tf	YBR029C
Ste12p	tf	YBR030W
Ino4p	tf	YBR030W
Ino2p	tf	YBR030W
Fkh1p	tf	YBR030W
Abf1p	tf	YBR030W
Ste12p	tf	YBR031W
Rap1p	tf	YBR031W
Abf1p	tf	YBR031W
Skn7p	tf	YBR032W
Rph1p	tf	YBR032W
Skn7p	tf	YBR033W
Rph1p	tf	YBR033W
Rgt1p	tf	YBR033W
Rfx1p	tf	YBR033W
Rap1p	tf	YBR033W
Sko1p	tf	YBR034C
Cin5p	tf	YBR034C
Rap1p	tf	YBR035C
Hcm1p	tf	YBR035C
Yap5p	tf	YBR036C
Rph1p	tf	YBR036C
Mcm1p	tf	YBR036C
Yap5p	tf	YBR037C
Mcm1p	tf	YBR037C
Fkh2p	tf	YBR037C
Yap5p	tf	YBR038W
Mcm1p	tf	YBR038W
Hap5p	tf	YBR038W
Hap4p	tf	YBR038W
Hap3p	tf	YBR038W
Hap2p	tf	YBR038W
Fkh2p	tf	YBR038W
Rds2p	tf	YBR039W
Yap6p	tf	YBR039W
Stp2p	tf	YBR039W
Ste12p	tf	YBR039W
Pdr1p	tf	YBR039W
Nrg1p	tf	YBR039W
Hap5p	tf	YBR039W
Hap4p	tf	YBR039W
Hap3p	tf	YBR039W
Hap2p	tf	YBR039W
Cbf1p	tf	YBR039W
Aft1p	tf	YBR039W
Tye7p	tf	YBR039W
Yap3p	tf	YBR040W
Tec1p	tf	YBR040W
Sum1p	tf	YBR040W
Stp2p	tf	YBR040W
Ste12p	tf	YBR040W
Pdr1p	tf	YBR040W
Arr1p	tf	YBR040W
Aft1p	tf	YBR040W
Sum1p	tf	YBR041W
Mcm1p	tf	YBR041W
Ino4p	tf	YBR041W
Aft1p	tf	YBR041W
Mga1p	tf	YBR041W
Rfx1p	tf	YBR042C
Rds2p	tf	YBR043C
Stp1p	tf	YBR043C
Ste12p	tf	YBR043C
Gcn4p	tf	YBR043C
Dal81p	tf	YBR043C
Pho2p	tf	YBR044C
Xbp1p	tf	YBR044C
Ste12p	tf	YBR044C
Rfx1p	tf	YBR044C
Rap1p	tf	YBR044C
Mcm1p	tf	YBR044C
Yap1p	tf	YBR046C
Rap1p	tf	YBR046C
Gcn4p	tf	YBR046C
Cad1p	tf	YBR046C
Yap5p	tf	YBR047W
Ste12p	tf	YBR047W
Rap1p	tf	YBR047W
Gcn4p	tf	YBR047W
Msn1p	tf	YBR047W
Pho2p	tf	YBR048W
Tec1p	tf	YBR048W
Ste12p	tf	YBR048W
Rap1p	tf	YBR048W
Met32p	tf	YBR048W
Leu3p	tf	YBR048W
Msn1p	tf	YBR048W
Yhp1p	tf	YBR048W
Ste12p	tf	YBR049C
Rpn4p	tf	YBR049C
Reb1p	tf	YBR049C
Hsf1p	tf	YBR049C
Cbf1p	tf	YBR049C
Swi4p	tf	YBR050C
Rgt1p	tf	YBR050C
Rap1p	tf	YBR050C
Mbp1p	tf	YBR050C
Ino4p	tf	YBR050C
Hsf1p	tf	YBR050C
Fkh1p	tf	YBR050C
Ash1p	tf	YBR050C
Ace2p	tf	YBR050C
Skn7p	tf	YBR051W
Rpn4p	tf	YBR051W
Mbp1p	tf	YBR051W
Hsf1p	tf	YBR051W
Cbf1p	tf	YBR051W
Ste12p	tf	YBR052C
Hsf1p	tf	YBR052C
Dal82p	tf	YBR052C
Yap1p	tf	YBR053C
Ste12p	tf	YBR053C
Skn7p	tf	YBR053C
Pdr1p	tf	YBR053C
Cin5p	tf	YBR053C
Yap6p	tf	YBR054W
Yap5p	tf	YBR054W
Yap1p	tf	YBR054W
Ste12p	tf	YBR054W
Sko1p	tf	YBR054W
Skn7p	tf	YBR054W
Fkh2p	tf	YBR054W
Cin5p	tf	YBR054W
Ste12p	tf	YBR055C
Yox1p	tf	YBR055C
Ste12p	tf	YBR056W
Rph1p	tf	YBR056W
Gcr1p	tf	YBR056W
Cad1p	tf	YBR056W
Adr1p	tf	YBR056W
Yox1p	tf	YBR056W
Ste12p	tf	YBR056W-A
Yap5p	tf	YBR057C
Yap3p	tf	YBR057C
Xbp1p	tf	YBR057C
Smp1p	tf	YBR057C
Rlm1p	tf	YBR057C
Pdr1p	tf	YBR057C
Gal4p	tf	YBR057C
Dal80p	tf	YBR057C
Ace2p	tf	YBR057C
Ste12p	tf	YBR060C
Rap1p	tf	YBR060C
Msn2p	tf	YBR060C
Hsf1p	tf	YBR060C
Gal4p	tf	YBR060C
Tye7p	tf	YBR061C
Ndt80p	tf	YBR063C
Sko1p	tf	YBR065C
Fkh2p	tf	YBR065C
Yap1p	tf	YBR066C
Tec1p	tf	YBR066C
Ste12p	tf	YBR066C
Sko1p	tf	YBR066C
Skn7p	tf	YBR066C
Rap1p	tf	YBR066C
Pho4p	tf	YBR066C
Nrg1p	tf	YBR066C
Mcm1p	tf	YBR066C
Ino4p	tf	YBR066C
Flo8p	tf	YBR066C
Tec1p	tf	YBR067C
Ste12p	tf	YBR067C
Msn2p	tf	YBR067C
Phd1p	tf	YBR067C
Stp2p	tf	YBR068C
Stp1p	tf	YBR068C
Ste12p	tf	YBR068C
Stb5p	tf	YBR068C
Skn7p	tf	YBR068C
Rap1p	tf	YBR068C
Gcn4p	tf	YBR068C
Dal81p	tf	YBR068C
Phd1p	tf	YBR068C
Yap1p	tf	YBR069C
Ste12p	tf	YBR069C
Rox1p	tf	YBR069C
Dal81p	tf	YBR069C
Cin5p	tf	YBR069C
Phd1p	tf	YBR069C
Swi5p	tf	YBR070C
Swi4p	tf	YBR070C
Mbp1p	tf	YBR070C
Fkh1p	tf	YBR070C
Cin5p	tf	YBR070C
Ash1p	tf	YBR070C
Swi5p	tf	YBR071W
Swi4p	tf	YBR071W
Smp1p	tf	YBR071W
Msn4p	tf	YBR071W
Mbp1p	tf	YBR071W
Hsf1p	tf	YBR071W
Fkh1p	tf	YBR071W
Cin5p	tf	YBR071W
Ash1p	tf	YBR071W
Yap6p	tf	YBR072W
Yap5p	tf	YBR072W
Ste12p	tf	YBR072W
Sko1p	tf	YBR072W
Rim101p	tf	YBR072W
Msn4p	tf	YBR072W
Hsf1p	tf	YBR072W
Cin5p	tf	YBR072W
Cad1p	tf	YBR072W
Xbp1p	tf	YBR073W
Msn4p	tf	YBR073W
Sum1p	tf	YBR074W
Msn4p	tf	YBR074W
Flo8p	tf	YBR074W
Cup9p	tf	YBR074W
Yap6p	tf	YBR076W
Swi4p	tf	YBR076W
Sum1p	tf	YBR076W
Cin5p	tf	YBR076W
Yap6p	tf	YBR077C
Tec1p	tf	YBR077C
Swi4p	tf	YBR077C
Ste12p	tf	YBR077C
Skn7p	tf	YBR077C
Rap1p	tf	YBR077C
Pdr1p	tf	YBR077C
Mcm1p	tf	YBR077C
Mbp1p	tf	YBR077C
Fkh2p	tf	YBR077C
Fkh1p	tf	YBR077C
Aft2p	tf	YBR077C
Abf1p	tf	YBR077C
Yap6p	tf	YBR078W
Tec1p	tf	YBR078W
Swi4p	tf	YBR078W
Ste12p	tf	YBR078W
Skn7p	tf	YBR078W
Pdr1p	tf	YBR078W
Mcm1p	tf	YBR078W
Mbp1p	tf	YBR078W
Fkh2p	tf	YBR078W
Fkh1p	tf	YBR078W
Aft2p	tf	YBR078W
Abf1p	tf	YBR078W
Swi4p	tf	YBR079C
Sko1p	tf	YBR079C
Stp2p	tf	YBR080C
Abf1p	tf	YBR080C
Pho2p	tf	YBR081C
Yap6p	tf	YBR081C
Xbp1p	tf	YBR081C
Stp2p	tf	YBR081C
Ste12p	tf	YBR081C
Reb1p	tf	YBR081C
Hsf1p	tf	YBR081C
Aft1p	tf	YBR081C
Mga1p	tf	YBR081C
Tec1p	tf	YBR082C
Swi5p	tf	YBR082C
Ste12p	tf	YBR082C
Rap1p	tf	YBR082C
Leu3p	tf	YBR082C
Ino4p	tf	YBR082C
Hsf1p	tf	YBR082C
Flo8p	tf	YBR082C
Cbf1p	tf	YBR082C
Phd1p	tf	YBR082C
Tec1p	tf	YBR083W
Swi5p	tf	YBR083W
Sum1p	tf	YBR083W
Ste12p	tf	YBR083W
Skn7p	tf	YBR083W
Pdr1p	tf	YBR083W
Ino4p	tf	YBR083W
Hsf1p	tf	YBR083W
Hap1p	tf	YBR083W
Flo8p	tf	YBR083W
Phd1p	tf	YBR083W
Ste12p	tf	YBR084C-A
Rap1p	tf	YBR084C-A
Msn2p	tf	YBR084C-A
Ste12p	tf	YBR084W
Pho2p	tf	YBR085C-A
Yap1p	tf	YBR085C-A
Ste12p	tf	YBR085C-A
Sko1p	tf	YBR085C-A
Skn7p	tf	YBR085C-A
Msn2p	tf	YBR085C-A
Ino4p	tf	YBR085C-A
Hsf1p	tf	YBR085C-A
Pho2p	tf	YBR085W
Zap1p	tf	YBR085W
Ste12p	tf	YBR085W
Rox1p	tf	YBR085W
Rap1p	tf	YBR085W
Msn2p	tf	YBR085W
Ino4p	tf	YBR085W
Hsf1p	tf	YBR085W
Rim101p	tf	YBR086C
Msn4p	tf	YBR086C
Mcm1p	tf	YBR086C
Ino4p	tf	YBR086C
Ecm22p	tf	YBR086C
Dal82p	tf	YBR086C
Dal81p	tf	YBR086C
Bas1p	tf	YBR086C
Arg81p	tf	YBR086C
Gcr2p	tf	YBR086C
Mga1p	tf	YBR086C
Rim101p	tf	YBR087W
Mcm1p	tf	YBR087W
Ino4p	tf	YBR087W
Ecm22p	tf	YBR087W
Dal82p	tf	YBR087W
Dal81p	tf	YBR087W
Bas1p	tf	YBR087W
Arg81p	tf	YBR087W
Gcr2p	tf	YBR087W
Mga1p	tf	YBR087W
Swi4p	tf	YBR088C
Ste12p	tf	YBR088C
Cbf1p	tf	YBR089C-A
Aft2p	tf	YBR089C-A
Ste12p	tf	YBR089W
Cbf1p	tf	YBR090C
Ash1p	tf	YBR090C
Aft2p	tf	YBR090C
Mcm1p	tf	YBR091C
Cbf1p	tf	YBR091C
Yap5p	tf	YBR092C
Mcm1p	tf	YBR092C
Fkh2p	tf	YBR092C
Thi2p	tf	YBR092C
Tec1p	tf	YBR093C
Rap1p	tf	YBR093C
Pho4p	tf	YBR093C
Mcm1p	tf	YBR093C
Fkh2p	tf	YBR093C
Fkh1p	tf	YBR093C
Arg81p	tf	YBR093C
Thi2p	tf	YBR093C
Tec1p	tf	YBR094W
Ste12p	tf	YBR094W
Fkh2p	tf	YBR094W
Arg81p	tf	YBR094W
Thi2p	tf	YBR094W
Reb1p	tf	YBR095C
Reb1p	tf	YBR096W
Mot3p	tf	YBR097W
Stp1p	tf	YBR098W
Hap4p	tf	YBR098W
Bas1p	tf	YBR098W
Arg81p	tf	YBR098W
Yap1p	tf	YBR099C
Hap4p	tf	YBR099C
Bas1p	tf	YBR099C
Arg81p	tf	YBR099C
Yap6p	tf	YBR101C
Yap5p	tf	YBR101C
Xbp1p	tf	YBR101C
Rpn4p	tf	YBR101C
Rfx1p	tf	YBR101C
Hsf1p	tf	YBR101C
Ecm22p	tf	YBR101C
Abf1p	tf	YBR101C
Yap5p	tf	YBR102C
Yap3p	tf	YBR102C
Uga3p	tf	YBR102C
Gln3p	tf	YBR102C
Cad1p	tf	YBR102C
Aft2p	tf	YBR102C
Aft1p	tf	YBR102C
Yap3p	tf	YBR103W
Uga3p	tf	YBR103W
Ste12p	tf	YBR103W
Gln3p	tf	YBR103W
Fkh2p	tf	YBR103W
Fkh1p	tf	YBR103W
Cad1p	tf	YBR103W
Aft2p	tf	YBR103W
Aft1p	tf	YBR103W
Ste12p	tf	YBR104W
Rtg3p	tf	YBR104W
Gcn4p	tf	YBR104W
Fkh2p	tf	YBR104W
Fkh1p	tf	YBR104W
Rds2p	tf	YBR105C
Ste12p	tf	YBR105C
Rgt1p	tf	YBR105C
Rap1p	tf	YBR105C
Ino4p	tf	YBR105C
Rds2p	tf	YBR106W
Ste12p	tf	YBR106W
Rap1p	tf	YBR106W
Ino4p	tf	YBR106W
Yap6p	tf	YBR107C
Sko1p	tf	YBR107C
Sko1p	tf	YBR108W
Rtg1p	tf	YBR108W
Hcm1p	tf	YBR108W
Upc2p	tf	YBR109C
Rpn4p	tf	YBR109C
Rfx1p	tf	YBR109C
Fkh1p	tf	YBR109C
Cst6p	tf	YBR109C
Adr1p	tf	YBR109C
Abf1p	tf	YBR109C
Upc2p	tf	YBR110W
Rpn4p	tf	YBR110W
Rfx1p	tf	YBR110W
Fkh1p	tf	YBR110W
Cst6p	tf	YBR110W
Abf1p	tf	YBR110W
Rfx1p	tf	YBR111C
Leu3p	tf	YBR111C
Ume6p	tf	YBR112C
Swi4p	tf	YBR112C
Sko1p	tf	YBR112C
Rap1p	tf	YBR112C
Gcn4p	tf	YBR112C
Phd1p	tf	YBR112C
Swi4p	tf	YBR113W
Rap1p	tf	YBR113W
Gcn4p	tf	YBR113W
Phd1p	tf	YBR113W
Ume6p	tf	YBR114W
Swi4p	tf	YBR114W
Ste12p	tf	YBR114W
Sko1p	tf	YBR114W
Rfx1p	tf	YBR114W
Rap1p	tf	YBR114W
Gcn4p	tf	YBR114W
Phd1p	tf	YBR114W
Gcn4p	tf	YBR115C
Ash1p	tf	YBR115C
Yap6p	tf	YBR116C
Yap5p	tf	YBR116C
Hsf1p	tf	YBR116C
Cin5p	tf	YBR116C
Cad1p	tf	YBR116C
Yap6p	tf	YBR117C
Yap5p	tf	YBR117C
Tec1p	tf	YBR117C
Ste12p	tf	YBR117C
Sko1p	tf	YBR117C
Rap1p	tf	YBR117C
Hsf1p	tf	YBR117C
Cad1p	tf	YBR117C
Yap5p	tf	YBR118W
Tec1p	tf	YBR118W
Ste12p	tf	YBR118W
Sko1p	tf	YBR118W
Rap1p	tf	YBR118W
Hsf1p	tf	YBR118W
Gcn4p	tf	YBR118W
Gcn4p	tf	YBR119W
Rap1p	tf	YBR121C
Mig1p	tf	YBR121C
Abf1p	tf	YBR122C
Ste12p	tf	YBR123C
Mig1p	tf	YBR124W
Hot1p	tf	YBR126C
Sko1p	tf	YBR126C
Rph1p	tf	YBR126C
Crz1p	tf	YBR126C
Adr1p	tf	YBR126C
Pip2p	tf	YBR127C
Oaf1p	tf	YBR127C
Met32p	tf	YBR127C
Gat1p	tf	YBR129C
Abf1p	tf	YBR129C
Mga1p	tf	YBR129C
Stp2p	tf	YBR130C
Ste12p	tf	YBR130C
Reb1p	tf	YBR130C
Aft1p	tf	YBR130C
Xbp1p	tf	YBR131W
Stp2p	tf	YBR131W
Reb1p	tf	YBR131W
Aft1p	tf	YBR131W
Stp2p	tf	YBR132C
Stp1p	tf	YBR132C
Aft2p	tf	YBR132C
Tec1p	tf	YBR133C
Ste12p	tf	YBR133C
Fkh2p	tf	YBR133C
Gcr2p	tf	YBR133C
Tye7p	tf	YBR133C
Fkh2p	tf	YBR134W
Aft2p	tf	YBR134W
Tec1p	tf	YBR135W
Ste12p	tf	YBR135W
Fkh2p	tf	YBR135W
Gcr2p	tf	YBR135W
Tye7p	tf	YBR135W
Stb5p	tf	YBR137W
Rpn4p	tf	YBR137W
Ste12p	tf	YBR138C
Rap1p	tf	YBR138C
Mcm1p	tf	YBR138C
Flo8p	tf	YBR138C
Fkh2p	tf	YBR138C
Fkh1p	tf	YBR138C
Yap5p	tf	YBR139W
Ste12p	tf	YBR139W
Rap1p	tf	YBR139W
Mcm1p	tf	YBR139W
Flo8p	tf	YBR139W
Fkh2p	tf	YBR139W
Fkh1p	tf	YBR139W
Ste12p	tf	YBR140C
Rds2p	tf	YBR141C
Rfx1p	tf	YBR141C
Rds2p	tf	YBR142W
Sko1p	tf	YBR142W
Reb1p	tf	YBR143C
Ino4p	tf	YBR143C
Abf1p	tf	YBR143C
Ino4p	tf	YBR144C
Gcn4p	tf	YBR144C
Cbf1p	tf	YBR144C
Gcr2p	tf	YBR144C
Tye7p	tf	YBR144C
Ino4p	tf	YBR145W
Gcn4p	tf	YBR145W
Cbf1p	tf	YBR145W
Abf1p	tf	YBR145W
Gcr2p	tf	YBR145W
Tye7p	tf	YBR145W
Abf1p	tf	YBR146W
Sum1p	tf	YBR147W
Gcn4p	tf	YBR147W
Cbf1p	tf	YBR147W
Sum1p	tf	YBR148W
Tye7p	tf	YBR148W
Adr1p	tf	YBR149W
Tec1p	tf	YBR150C
Ste12p	tf	YBR150C
Pip2p	tf	YBR150C
Oaf1p	tf	YBR150C
Nrg1p	tf	YBR150C
Yrm1p	tf	YBR151W
Tec1p	tf	YBR151W
Ste12p	tf	YBR151W
Pip2p	tf	YBR151W
Pho4p	tf	YBR151W
Oaf1p	tf	YBR151W
Nrg1p	tf	YBR151W
Ixr1p	tf	YBR151W
Ste12p	tf	YBR152W
Pho4p	tf	YBR152W
Xbp1p	tf	YBR153W
Rpn4p	tf	YBR153W
Rfx1p	tf	YBR153W
Ino4p	tf	YBR153W
Cad1p	tf	YBR153W
Ste12p	tf	YBR156C
Swi5p	tf	YBR157C
Ste12p	tf	YBR157C
Sko1p	tf	YBR157C
Skn7p	tf	YBR157C
Rlm1p	tf	YBR157C
Rap1p	tf	YBR157C
Pdr1p	tf	YBR157C
Nrg1p	tf	YBR157C
Mcm1p	tf	YBR157C
Leu3p	tf	YBR157C
Fkh2p	tf	YBR157C
Fkh1p	tf	YBR157C
Cin5p	tf	YBR157C
Ace2p	tf	YBR157C
Phd1p	tf	YBR157C
Swi5p	tf	YBR158W
Ste12p	tf	YBR158W
Skn7p	tf	YBR158W
Rox1p	tf	YBR158W
Rlm1p	tf	YBR158W
Pdr1p	tf	YBR158W
Mcm1p	tf	YBR158W
Fkh2p	tf	YBR158W
Fkh1p	tf	YBR158W
Ace2p	tf	YBR158W
Gcr2p	tf	YBR158W
Phd1p	tf	YBR158W
Upc2p	tf	YBR159W
Mot3p	tf	YBR159W
Mig1p	tf	YBR159W
Ecm22p	tf	YBR159W
Ace2p	tf	YBR159W
Phd1p	tf	YBR159W
Pho2p	tf	YBR160W
Rap1p	tf	YBR160W
Mig1p	tf	YBR160W
Mcm1p	tf	YBR160W
Pho2p	tf	YBR161W
Yrm1p	tf	YBR161W
Swi4p	tf	YBR161W
Sko1p	tf	YBR161W
Tec1p	tf	YBR162C
Swi4p	tf	YBR162C
Ste12p	tf	YBR162C
Gcn4p	tf	YBR162C
Phd1p	tf	YBR162C
Tec1p	tf	YBR162W-A
Swi4p	tf	YBR162W-A
Ste12p	tf	YBR162W-A
Gcn4p	tf	YBR162W-A
Fkh1p	tf	YBR162W-A
Phd1p	tf	YBR162W-A
Pho2p	tf	YBR163W
Swi4p	tf	YBR163W
Rtg3p	tf	YBR163W
Reb1p	tf	YBR163W
Leu3p	tf	YBR163W
Fkh1p	tf	YBR163W
Phd1p	tf	YBR163W
Reb1p	tf	YBR164C
Aft1p	tf	YBR164C
Phd1p	tf	YBR164C
Aft1p	tf	YBR165W
Xbp1p	tf	YBR166C
Msn4p	tf	YBR166C
Msn2p	tf	YBR166C
Dal82p	tf	YBR166C
Dal80p	tf	YBR166C
Cup9p	tf	YBR166C
Stp1p	tf	YBR167C
Rtg3p	tf	YBR167C
Rtg1p	tf	YBR167C
Msn4p	tf	YBR167C
Msn2p	tf	YBR167C
Mcm1p	tf	YBR167C
Ino4p	tf	YBR167C
Hap5p	tf	YBR167C
Hap4p	tf	YBR167C
Hap3p	tf	YBR167C
Hap2p	tf	YBR167C
Fzf1p	tf	YBR167C
Cst6p	tf	YBR167C
Aft1p	tf	YBR167C
Mga1p	tf	YBR167C
Stp1p	tf	YBR168W
Rtg1p	tf	YBR168W
Msn4p	tf	YBR168W
Msn2p	tf	YBR168W
Mcm1p	tf	YBR168W
Ino4p	tf	YBR168W
Hap5p	tf	YBR168W
Hap4p	tf	YBR168W
Hap3p	tf	YBR168W
Hap2p	tf	YBR168W
Cst6p	tf	YBR168W
Aft1p	tf	YBR168W
Mga1p	tf	YBR168W
Yap6p	tf	YBR169C
Skn7p	tf	YBR169C
Hsf1p	tf	YBR169C
Cin5p	tf	YBR169C
Reb1p	tf	YBR170C
Reb1p	tf	YBR171W
Uga3p	tf	YBR172C
Ino4p	tf	YBR173C
Reb1p	tf	YBR175W
Ino4p	tf	YBR175W
Dal81p	tf	YBR176W
Yap1p	tf	YBR177C
[truncated: 22,702 more rows]
