# Supplementary material for: Transcriptional remodelling in response to changing copper levels in the Wilson and Menkes disease model of Saccharomyces cerevisiae
Source: Royal Society of Chemistry journal article supplement (doi:10.1039/c3mb70276f), 2013-08-22
Supplement: c3mb70276f_2.pdf [file c3mb70276f_2.pdf]

ESI 3. Enriched go-terms among the significantly expressed genes in response to change in the copper level in the CCC2 deleted and reference strain.

| EFFECT OF COPPER LEVEL |                                            | Enriched GO-Biological Process Terms                |                                                      |
|------------------------|--------------------------------------------|-----------------------------------------------------|------------------------------------------------------|
|                        |                                            | CCC2Δ/ CCC2Δ                                        | Reference strain                                     |
| UP                     | High Cu vs Low Cu                          |                                                     |                                                      |
|                        | High Cu vs Cu Def                          | Actin cortical patch assembly<br>(p-val ≤ 9.35e-04) |                                                      |
| DOWN                   | High Cu vs Low Cu                          |                                                     | Ribosome biogenesis<br>(p-val ≤ 4.95e-07)            |
|                        |                                            |                                                     | Maturation of SSU-rRNA process<br>(p-val ≤ 4.54e-03) |
|                        |                                            |                                                     | Copper ion import<br>(p-val ≤ 3.22 e-03)             |
|                        | High Cu vs Cu Def                          | Copper ion import<br>(p-val ≤ 3.75e-07)             | Ribosome biogenesis<br>(p-val ≤ 8.82e-03)            |
|                        |                                            | Oxidation-reduction process<br>(p-val ≤ 2.21e-03)   |                                                      |
|                        | Iron ion homeostasis<br>(p-val ≤ 1.68e-02) |                                                     |                                                      |
| Low Cu vs Cu Def       | Copper ion import<br>(p-val ≤ 1.41e-06)    |                                                     |                                                      |
