# Supplementary material for: Transcriptional remodelling in response to changing copper levels in the Wilson and Menkes disease model of Saccharomyces cerevisiae
Source: Royal Society of Chemistry journal article supplement (doi:10.1039/c3mb70276f), 2013-08-22
Supplement: c3mb70276f_2.xlsx [file c3mb70276f_2.xlsx]

## Sheet: copper effect
#Total number of ORFs used =	4977
#Total number of significantly changed ORFs =	0
#Mean_all =	1.76177	#Std_all=	1.37413
#kmax, imax = 100, 10000
#Feature	Number of neighbors	Z-score	P-value	Average Z	StdDev Z	Significance count
Tec1p	485	4.45106	1.38463e-05	2.03853	1.51177	302
Sko1p	529	4.33421	2.37408e-05	2.01979	1.39853	330
Skn7p	504	3.93942	4.0839e-05	2.00205	1.42832	312
Phd1p	451	3.82577	6.51816e-05	2.00848	1.4058	287
Hap1p	131	3.71298	0.000102416	2.20669	1.28218	87
Ste12p	1871	3.53627	0.000202908	1.87354	1.40732	1107
Pho4p	273	3.49378	0.000238118	2.05152	1.39173	177
Nrg1p	229	3.41707	0.000316495	2.07126	1.42813	142
Hap5p	156	3.25542	0.000566122	2.11916	1.20978	110
Cad1p	206	3.02224	0.00125458	2.05041	1.4365	126
Gcn4p	278	2.98168	0.00143335	2.00681	1.34689	182
Ash1p	100	2.97227	0.00147803	2.16955	1.49484	66
Cup2p	2	2.97119	0.00148323	4.65756	0.0035273	2
Swi4p	396	2.96904	0.00149366	1.96613	1.4386	251
Flo8p	221	2.94492	0.00161517	2.03329	1.35158	144
Rlm1p	104	2.84653	0.00220994	2.14469	1.35667	70
Rgt1p	59	2.63513	0.00420523	2.23273	1.5099	41
Mga1p	174	2.61132	0.00450966	2.03319	1.32364	110
Ino2p	69	2.45994	0.00694792	2.16824	1.34294	48
Rtg3p	172	2.36743	0.00895609	2.00927	1.2347	114
Cin5p	510	2.32523	0.0100298	1.90276	1.43863	321
Hap2p	149	2.05458	0.0199599	1.99258	1.2373	99
Met31p	86	1.98853	0.0233768	2.05601	1.51668	54
Ixr1p	108	1.94423	0.0259337	2.01842	1.4213	70
Mcm1p	382	1.75768	0.0394011	1.88496	1.38379	217
Hap4p	160	1.72063	0.0426593	1.94829	1.18653	104
Rim101p	137	1.69171	0.0453507	1.95999	1.41399	86
Rap1p	1241	1.63258	0.0512792	1.82516	1.37565	734
Rds2p	40	1.63046	0.0515018	2.11584	1.32181	27
Fkh2p	274	1.56703	0.0585537	1.8915	1.48188	160
Pdr3p	114	1.54388	0.0613087	1.96012	1.36737	72
Rox1p	161	1.53828	0.0619904	1.928	1.46906	97
Ecm22p	140	1.50887	0.0656659	1.93666	1.47278	85
Hap3p	146	1.48758	0.0684311	1.9306	1.29676	90
Cup9p	70	1.47982	0.0694612	2.00453	1.31488	46
Gln3p	137	1.4656	0.071379	1.9335	1.40713	85
Met4p	56	1.4349	0.0756573	2.02502	1.24364	37
Stb5p	135	1.39692	0.0812187	1.92666	1.38001	83
Gcr2p	125	1.23094	0.109172	1.91278	1.34091	76
Yap6p	551	1.15613	0.123815	1.82921	1.35954	318
Met28p	51	1.10533	0.134508	1.97429	1.25504	33
Cbf1p	308	1.10375	0.134851	1.84794	1.35252	185
Mac1p	82	1.09459	0.136847	1.92765	1.4376	49
Mbp1p	300	1.06332	0.143818	1.84589	1.25591	182
Bas1p	105	0.992519	0.160472	1.89465	1.40695	65
Msn4p	220	0.972413	0.165423	1.85163	1.39902	132
Smp1p	170	0.967556	0.166633	1.86352	1.39627	97
Ime1p	6	0.927496	0.176834	2.283	1.51519	4
Ndd1p	2	0.918501	0.179178	2.65699	1.30276	2
Swi5p	177	0.904306	0.182917	1.85496	1.50293	97
Pho2p	116	0.88493	0.188097	1.87448	1.32686	73
Dal81p	210	0.79906	0.212128	1.83736	1.37636	130
Mot3p	45	0.787368	0.215533	1.92296	1.34046	26
Yap1p	425	0.773253	0.219686	1.81315	1.44169	240
Ace2p	132	0.735646	0.230973	1.84959	1.49527	77
Kar4p	1	0.665689	0.252805	2.6801	0	1
Gal4p	89	0.665109	0.25299	1.85851	1.35145	55
Mss11p	57	0.646081	0.259113	1.87926	1.16804	33
Yrm1p	23	0.626603	0.26546	1.94134	1.43954	13
Ino4p	584	0.619758	0.267709	1.79689	1.4309	336
Xbp1p	375	0.580142	0.28091	1.80281	1.41442	211
Met32p	75	0.526937	0.299119	1.84528	1.34995	45
Yap3p	37	0.523046	0.300471	1.87989	1.33631	22
Msn2p	280	0.483809	0.314261	1.80139	1.49076	155
Pdr1p	301	0.472912	0.318138	1.79912	1.49854	177
Hsf1p	216	0.422802	0.33622	1.80121	1.4328	115
Aca1p	2	0.34325	0.365705	2.09634	0.14276	2
Thi2p	59	0.244932	0.403254	1.80555	1.41907	35
War1p	14	0.234581	0.407267	1.848	1.53372	9
Crz1p	46	0.218734	0.413429	1.80607	1.33432	25
Mig3p	6	0.216948	0.414124	1.88371	0.892261	3
Dal82p	154	0.21049	0.416643	1.78504	1.36976	92
Rdr1p	1	0.204221	0.41909	2.04353	0	1
Aft2p	129	0.162118	0.435606	1.78135	1.38143	71
Mig1p	97	0.156924	0.437652	1.78364	1.34144	63
Rme1p	72	0.123541	0.450839	1.78176	1.26201	41
Arg81p	87	0.109433	0.456429	1.77788	1.38425	48
Yap5p	406	0.0915082	0.463544	1.768	1.36215	225
Tye7p	87	0.0691296	0.472443	1.77195	1.56882	49
Ume6p	165	0.0183395	0.492684	1.76374	1.44642	88
Azf1p	45	0.017168	0.493151	1.7653	1.61514	25
Yox1p	305	-0.0556856	0.522204	1.75741	1.27627	179
Yhp1p	133	-0.0695729	0.527733	1.7535	1.31739	74
Gis1p	2	-0.0727383	0.528993	1.69091	0.151238	1
Abf1p	459	-0.0828111	0.532999	1.75648	1.30912	263
Rtg1p	84	-0.0876938	0.53494	1.74865	1.18755	52
Cat8p	8	-0.182861	0.572547	1.67283	1.71976	4
Gat1p	131	-0.202214	0.580125	1.73755	1.32501	75
Pdc2p	6	-0.204921	0.581183	1.64664	1.20336	4
Fkh1p	212	-0.210872	0.583507	1.74193	1.52163	114
Stp2p	83	-0.213788	0.584644	1.72958	1.34395	48
Hot1p	67	-0.266938	0.605242	1.71702	1.42223	34
Hcm1p	205	-0.267534	0.605471	1.73616	1.40535	108
Pdr8p	7	-0.26911	0.606077	1.62181	1.17309	3
Msn1p	74	-0.275265	0.608444	1.71786	1.56861	41
Ppr1p	25	-0.302727	0.618951	1.67858	1.56312	13
Zap1p	55	-0.344444	0.634744	1.69802	1.28603	31
Dal80p	42	-0.393235	0.652927	1.67845	1.38895	25
Haa1p	3	-0.444788	0.671763	1.40802	1.66608	1
Ndt80p	19	-0.450548	0.673842	1.6197	1.65474	8
Sfl1p	31	-0.469781	0.680744	1.64587	1.39743	17
Oaf1p	73	-0.546517	0.707645	1.67399	1.4079	38
Arr1p	18	-0.561321	0.712711	1.5799	1.14689	9
Fzf1p	80	-0.570343	0.715777	1.67427	1.41199	43
Leu3p	232	-0.574354	0.717136	1.7101	1.36135	127
Aro80p	88	-0.584119	0.72043	1.67634	1.4244	44
Arg80p	87	-0.613675	0.730285	1.6715	1.30856	46
Rfx1p	377	-0.616484	0.731212	1.71829	1.33636	209
Adr1p	192	-0.721408	0.764671	1.69041	1.49063	96
Gsm1p	19	-0.850373	0.802441	1.49361	1.6028	8
Stp1p	125	-0.904388	0.817105	1.65083	1.36451	70
Pip2p	46	-0.924608	0.822415	1.57458	1.468	23
Uga3p	84	-0.999414	0.841203	1.61215	1.33688	42
Cst6p	20	-1.04311	0.851551	1.44118	1.77366	11
Cha4p	79	-1.05698	0.854739	1.59859	1.41084	39
Put3p	117	-1.26331	0.896761	1.60158	1.28699	59
Gcr1p	65	-1.47073	0.929318	1.51139	1.34615	29
Sum1p	108	-1.56417	0.941111	1.55531	1.43853	55
Upc2p	32	-1.67607	0.953137	1.35475	1.562	16
Aft1p	361	-1.8505	0.967879	1.62836	1.33429	202
Sip4p	75	-1.89828	0.97117	1.46096	1.27541	38
Mig2p	21	-2.06418	0.9805	1.14267	1.17346	7
Yrr1p	26	-2.36508	0.990987	1.12443	1.40552	11
Rph1p	72	-2.38239	0.9914	1.37644	1.62871	33
Rpn4p	183	-2.4087	0.991995	1.51768	1.33353	91
Reb1p	476	-2.62902	0.995718	1.59677	1.37835	256
Hac1p	18	-2.8168	0.997575	0.849082	1.45169	6

## Sheet: mutant effect
#Total number of ORFs used =	4977
#Total number of significantly changed ORFs =	0
#Mean_all =	1.16102	#Std_all=	1.39017
#kmax, imax = 100, 10000
#Feature	Number of neighbors	Z-score	P-value	Average Z	StdDev Z	Significance count
Tec1p	485	4.64762	5.42826e-06	1.45506	1.36252	228
Skn7p	504	4.59221	7.09457e-06	1.44603	1.43113	240
Hap5p	156	4.20981	4.15531e-05	1.6302	1.37322	80
Sko1p	529	3.46092	0.000269166	1.37067	1.37889	230
Flo8p	221	3.42533	0.000307024	1.48182	1.42768	108
Fkh2p	274	3.29913	0.000484924	1.43856	1.42664	125
Hsf1p	216	3.07107	0.00106647	1.45194	1.33321	97
Ash1p	100	3.02829	0.00122973	1.58237	1.54414	51
Pho4p	273	3.01257	0.00129522	1.41491	1.36778	132
Hap1p	131	2.89398	0.00190194	1.5129	1.41669	59
Swi4p	396	2.87992	0.00198887	1.36259	1.44393	177
Gln3p	137	2.86757	0.00206817	1.50197	1.42202	71
Ace2p	132	2.83525	0.00228952	1.50444	1.46968	66
Rds2p	40	2.79038	0.00263231	1.77443	1.24901	24
Hap3p	146	2.76207	0.00287179	1.47916	1.46497	67
Met4p	56	2.73557	0.00311365	1.66939	1.40071	31
Stb5p	135	2.65191	0.00400186	1.47865	1.42679	69
Hap2p	149	2.60767	0.00455808	1.45833	1.42075	69
Phd1p	451	2.53429	0.00563374	1.32724	1.4443	196
Pho2p	116	2.45043	0.00713423	1.47759	1.42013	61
Met28p	51	2.43147	0.00751881	1.63445	1.3929	29
Mga1p	174	2.40793	0.0080216	1.41509	1.56733	87
Ste12p	1871	2.35937	0.00915311	1.23708	1.42518	771
Gsm1p	19	2.35785	0.00919068	1.91259	1.01408	11
Gcn4p	278	2.31632	0.0102703	1.35445	1.3866	123
Yap5p	406	2.30911	0.0104688	1.32063	1.41376	176
Bas1p	105	2.29618	0.0108328	1.47278	1.46288	50
Msn2p	280	2.28536	0.0111457	1.35118	1.45592	124
Gcr2p	125	2.26332	0.0118079	1.4427	1.32495	60
War1p	14	2.07868	0.0188232	1.93267	1.24676	11
Ino2p	69	1.92056	0.0273937	1.48255	1.50276	37
Met31p	86	1.878	0.0301906	1.44269	1.40383	42
Yap1p	425	1.7687	0.0384718	1.28049	1.41137	183
Rgt1p	59	1.74449	0.0405368	1.4768	1.29	26
Hap4p	160	1.7134	0.0433197	1.3495	1.39138	67
Mot3p	45	1.57489	0.0576406	1.48735	1.42889	23
Met32p	75	1.52316	0.0638591	1.40559	1.3051	35
Ecm22p	140	1.4833	0.0689973	1.33542	1.52554	67
Mcm1p	382	1.43778	0.0752479	1.26344	1.46569	162
Msn4p	220	1.41573	0.0784267	1.29385	1.45777	91
Rdr1p	1	1.41514	0.0785142	3.12204	0	1
Pdr3p	114	1.3865	0.0827978	1.34164	1.41939	50
Cbf1p	308	1.32034	0.0933611	1.26574	1.36471	130
Cup2p	2	1.29862	0.0970366	2.4341	1.05507	2
Pdr1p	301	1.25445	0.104839	1.26166	1.35592	122
Mbp1p	300	1.17133	0.120733	1.25514	1.31397	130
Yap6p	551	1.04085	0.148972	1.22275	1.44769	232
Dal81p	210	1.02477	0.152737	1.25939	1.48103	92
Rap1p	1241	0.966906	0.166795	1.19925	1.4363	494
Msn1p	74	0.966651	0.166859	1.3172	1.50308	31
Rox1p	161	0.951856	0.170585	1.26535	1.51992	68
Mig1p	97	0.925308	0.177403	1.29162	1.43675	41
Swi5p	177	0.899192	0.184275	1.25501	1.46987	68
Ino4p	584	0.892175	0.18615	1.21241	1.41757	247
Rim101p	137	0.885584	0.187921	1.26622	1.48738	65
Cad1p	206	0.86749	0.192837	1.24508	1.38919	88
Dal82p	154	0.798513	0.212286	1.25048	1.41017	62
Gat1p	131	0.772719	0.219844	1.25487	1.38587	56
Cin5p	510	0.755651	0.224929	1.20758	1.46797	215
Oaf1p	73	0.730656	0.232495	1.27983	1.42382	29
Mss11p	57	0.668444	0.251925	1.28399	1.25512	23
Pdc2p	6	0.662676	0.253769	1.53609	1.6423	3
Adr1p	192	0.640107	0.261051	1.22523	1.31662	79
Rtg3p	172	0.610849	0.27065	1.22575	1.35225	67
Abf1p	459	0.59409	0.276226	1.19959	1.36907	170
Stp2p	83	0.593679	0.276363	1.25153	1.53661	39
Cup9p	70	0.582814	0.280009	1.25776	1.41653	26
Rph1p	72	0.488038	0.312761	1.24086	1.11465	28
Tye7p	87	0.468341	0.31977	1.23073	1.41608	35
Nrg1p	229	0.459631	0.322891	1.20322	1.404	85
Xbp1p	375	0.443642	0.328651	1.19286	1.47338	155
Rlm1p	104	0.396685	0.3458	1.215	1.75432	46
Mig2p	21	0.357743	0.360268	1.26919	1.09176	8
Stp1p	125	0.274572	0.391823	1.19506	1.28208	47
Fkh1p	212	0.269398	0.393812	1.18668	1.51433	89
Hot1p	67	0.218571	0.413492	1.19798	1.41141	25
Yrr1p	26	0.204721	0.418895	1.21653	1.05764	11
Ndd1p	2	0.201434	0.42018	1.35752	2.90961	1
Arr1p	18	0.17897	0.428981	1.21927	1.23629	7
Haa1p	3	0.168701	0.433016	1.29528	1.798	2
Gcr1p	65	0.158382	0.437078	1.18815	1.35056	28
Mig3p	6	0.131931	0.447519	1.23516	1.26325	3
Rme1p	72	0.0811034	0.46768	1.17413	1.48815	27
Mac1p	82	0.0731704	0.470835	1.17208	1.40272	33
Sfl1p	31	-0.00507231	0.502024	1.15946	1.6766	14
Ppr1p	25	-0.0228605	0.509119	1.15434	1.70729	13
Gal4p	89	-0.0454964	0.518144	1.15413	1.3694	33
Yrm1p	23	-0.0689807	0.527498	1.14068	1.15641	7
Aca1p	2	-0.129279	0.551432	1.03302	0.448351	0
Azf1p	45	-0.151752	0.560309	1.12931	1.45051	14
Dal80p	42	-0.202054	0.580063	1.1174	1.56533	19
Arg81p	87	-0.210935	0.583531	1.12937	1.43358	33
Yhp1p	133	-0.230284	0.591065	1.13308	1.39744	50
Leu3p	232	-0.333745	0.630714	1.13039	1.54884	94
Ume6p	165	-0.341569	0.633662	1.12387	1.40224	61
Ime1p	6	-0.350483	0.637012	0.961633	1.64476	2
Aft2p	129	-0.405506	0.657447	1.11117	1.40545	49
Rpn4p	183	-0.407207	0.658072	1.11898	1.31004	69
Pip2p	46	-0.430196	0.666473	1.07255	1.351	16
Kar4p	1	-0.447442	0.672722	0.538836	0	0
Cha4p	79	-0.451142	0.674056	1.0902	1.28877	30
Uga3p	84	-0.572474	0.716499	1.07391	1.34831	39
Ndt80p	19	-0.591965	0.723063	0.971861	1.24739	6
Hcm1p	205	-0.593037	0.723422	1.10322	1.30514	78
Upc2p	32	-0.678013	0.751118	0.99405	1.50602	12
Aro80p	88	-0.679964	0.751736	1.05996	1.46412	33
Sum1p	108	-0.694569	0.756337	1.06783	1.34583	34
Cst6p	20	-0.717377	0.763429	0.937659	1.59465	7
Zap1p	55	-0.73127	0.767693	1.02361	1.511	21
Ixr1p	108	-0.776298	0.781213	1.05688	1.49874	40
Thi2p	59	-0.797932	0.787545	1.01627	1.52787	22
Put3p	117	-0.869999	0.80785	1.0489	1.39492	42
Fzf1p	80	-0.870443	0.807971	1.0254	1.40819	30
Crz1p	46	-0.873985	0.808937	0.981523	1.35682	16
Smp1p	170	-0.893453	0.814193	1.06547	1.51094	65
Hac1p	18	-1.06056	0.855554	0.813158	1.79439	5
Cat8p	8	-1.12268	0.869213	0.609048	1.78064	2
Pdr8p	7	-1.12957	0.870672	0.567379	1.0253	0
Arg80p	87	-1.16761	0.878519	0.986621	1.35046	28
Gis1p	2	-1.19205	0.88338	-0.00979501	2.17313	0
Rtg1p	84	-1.28811	0.901145	0.965243	1.33209	30
Yap3p	37	-1.32816	0.907937	0.857066	1.14602	11
Aft1p	361	-1.86807	0.969124	1.02394	1.4245	127
Rfx1p	377	-1.89769	0.971132	1.02475	1.47471	143
Reb1p	476	-1.91244	0.97209	1.03878	1.3869	172
Yox1p	305	-2.60645	0.995426	0.953008	1.32776	92
Sip4p	75	-3.14778	0.999177	0.655019	1.32016	23

## Sheet: interaction effect
#Total number of ORFs used =	4977
#Total number of significantly changed ORFs =	0
#Mean_all =	0.879231	#Std_all=	1.16768
#kmax, imax = 100, 10000
#Feature	Number of neighbors	Z-score	P-value	Average Z	StdDev Z	Significance count
Hap5p	156	4.38473	1.88338e-05	1.28852	1.24568	64
Hap2p	149	4.34591	2.25064e-05	1.29432	1.23485	58
Gcn4p	278	3.85839	5.70681e-05	1.14904	1.22365	98
Mga1p	174	3.60646	0.000155201	1.19802	1.19511	58
Gln3p	137	3.51494	0.000219929	1.22938	1.12063	54
Pho4p	273	3.33273	0.00042999	1.11442	1.30942	90
Sko1p	529	3.26767	0.000542182	1.04489	1.18273	167
Tec1p	485	3.22334	0.000633535	1.0499	1.17671	142
Hap3p	146	3.17906	0.000738757	1.18603	1.27861	51
Flo8p	221	3.09368	0.000988447	1.1219	1.1962	75
Cin5p	510	3.05921	0.0011096	1.03719	1.11401	143
Swi4p	396	2.94772	0.00160065	1.05196	1.14759	116
Nrg1p	229	2.85714	0.00213736	1.09941	1.20744	75
Dal81p	210	2.83112	0.00231929	1.10706	1.17877	64
Yap1p	425	2.67035	0.00378858	1.03029	1.15937	128
Hap4p	160	2.65795	0.00393083	1.12429	1.27065	55
Ste12p	1871	2.59693	0.00470302	0.949245	1.15829	498
Fkh2p	274	2.56876	0.00510319	1.06021	1.26228	93
Skn7p	504	2.5524	0.00534919	1.01182	1.19176	152
Rtg3p	172	2.54887	0.00540364	1.10589	1.15588	63
Yap5p	406	2.51924	0.00588041	1.02504	1.18633	119
Yap6p	551	2.43777	0.00738905	1.00035	1.13053	147
Hap1p	131	2.43358	0.00747517	1.12722	1.10612	42
Sum1p	108	2.42834	0.00758409	1.15176	1.46046	41
Aro80p	88	2.22538	0.0130278	1.15594	1.2469	30
Cup2p	2	2.20126	0.0138588	2.695	0.19432	2
Rlm1p	104	2.19114	0.0142207	1.12985	1.19051	30
Cad1p	206	2.16544	0.0151769	1.05521	1.14271	59
Phd1p	451	1.94492	0.0258921	0.986065	1.1967	130
Stb5p	135	1.88575	0.0296644	1.06857	1.14681	45
Pdc2p	6	1.87461	0.030423	1.77212	0.619018	4
Pdr1p	301	1.86231	0.0312794	1.00446	1.18932	88
Rim101p	137	1.75067	0.0400014	1.05373	1.08242	38
Gsm1p	19	1.70516	0.0440826	1.33567	1.03492	6
Ino2p	69	1.67404	0.047061	1.11438	1.16545	25
Mbp1p	300	1.59828	0.0549903	0.986901	1.07652	84
Ndt80p	19	1.49525	0.0674252	1.27955	0.968221	9
Aft2p	129	1.42359	0.0772821	1.02551	1.04209	38
Hac1p	18	1.37617	0.084384	1.25781	1.15119	6
Ash1p	100	1.35984	0.0869409	1.03794	0.980788	25
Cup9p	70	1.35738	0.0873299	1.06858	1.2822	22
Thi2p	59	1.32129	0.0932026	1.08001	1.23638	22
Rpn4p	183	1.31757	0.0938237	0.992909	1.16089	52
Pdr3p	114	1.21282	0.112599	1.01183	1.21705	34
Ndd1p	2	1.19218	0.116596	1.86342	1.12012	1
Put3p	117	1.12895	0.129459	1.00108	1.04695	32
Cat8p	8	1.11885	0.131601	1.34109	1.34376	3
Rgt1p	59	1.10228	0.135169	1.04678	1.08583	19
Mcm1p	382	1.06929	0.14247	0.943108	1.20456	105
Azf1p	45	1.0668	0.143031	1.06492	1.02604	14
Cbf1p	308	1.05842	0.144931	0.949648	1.17904	88
Pho2p	116	1.02259	0.15325	0.990099	1.22797	36
Rox1p	161	0.975652	0.164618	0.969026	1.16273	40
Rds2p	40	0.925845	0.177263	1.05021	1.24181	13
Arr1p	18	0.924086	0.177721	1.13363	1.10762	5
Sfl1p	31	0.917473	0.179447	1.0717	1.49974	10
Ixr1p	108	0.91064	0.181242	0.981578	1.16472	32
Mot3p	45	0.903047	0.183251	1.03647	1.26868	15
Ecm22p	140	0.856852	0.195763	0.963826	1.25344	38
Tye7p	87	0.846056	0.198761	0.985196	1.16766	26
Gat1p	131	0.808055	0.209529	0.961715	1.07636	39
Ace2p	132	0.807125	0.209797	0.961308	1.30592	40
Ime1p	6	0.789084	0.215031	1.25565	1.19002	2
Yhp1p	133	0.741153	0.2293	0.954333	1.18939	37
Pdr8p	7	0.727327	0.233513	1.20053	0.838881	3
Smp1p	170	0.706844	0.239832	0.942592	1.29312	53
Adr1p	192	0.693295	0.244062	0.937712	1.16656	52
Yrm1p	23	0.687054	0.246024	1.04669	0.972312	9
Rme1p	72	0.681389	0.247813	0.973097	1.07001	16
Yap3p	37	0.680178	0.248196	1.00994	0.907818	9
Msn2p	280	0.633412	0.263232	0.923487	1.21855	73
Oaf1p	73	0.617235	0.26854	0.963702	1.30282	23
Leu3p	232	0.578076	0.281606	0.923617	1.22391	67
Cst6p	20	0.524981	0.299798	1.01658	1.40798	8
Dal82p	154	0.508336	0.305609	0.927162	1.03985	40
Dal80p	42	0.503477	0.307314	0.970141	1.17202	12
Msn1p	74	0.497719	0.309341	0.946939	1.18549	22
Aca1p	2	0.454034	0.324902	1.25512	0.925406	1
Rap1p	1241	0.444575	0.328313	0.894006	1.17429	320
War1p	14	0.438207	0.330618	1.01637	1.22276	4
Swi5p	177	0.426667	0.334811	0.916786	1.17576	46
Hsf1p	216	0.382306	0.351117	0.90971	1.05165	53
Ppr1p	25	0.373786	0.354282	0.966838	1.65637	9
Yrr1p	26	0.363045	0.358286	0.962682	0.85218	8
Mac1p	82	0.346105	0.364632	0.92404	1.14806	16
Ino4p	584	0.342381	0.366032	0.895841	1.1688	160
Rdr1p	1	0.338239	0.367592	1.27587	0	0
Mss11p	57	0.302999	0.380945	0.926323	0.961727	15
Ume6p	165	0.247722	0.402175	0.901894	1.20491	42
Upc2p	32	0.223012	0.411763	0.925604	1.18516	8
Arg81p	87	0.111104	0.455767	0.893374	1.12752	21
Bas1p	105	0.103291	0.458866	0.891216	1.17838	20
Gcr1p	65	0.0597951	0.476159	0.888177	0.947732	16
Met28p	51	0.0251313	0.489975	0.883674	0.917526	15
Msn4p	220	0.00376861	0.498497	0.879692	1.16729	55
Xbp1p	375	-0.0358387	0.514294	0.877201	1.12906	94
Rfx1p	377	-0.0609008	0.524281	0.875702	1.10007	89
Mig1p	97	-0.186588	0.574008	0.857402	1.33879	28
Gal4p	89	-0.232144	0.591787	0.850814	1.09086	25
Mig3p	6	-0.285969	0.612549	0.74417	1.34621	1
Met4p	56	-0.290464	0.614269	0.834325	1.21583	17
Met31p	86	-0.290984	0.614468	0.842929	1.25524	28
Stp1p	125	-0.323874	0.626983	0.845692	1.15019	31
Yox1p	305	-0.396269	0.654047	0.85293	1.12741	70
Zap1p	55	-0.521743	0.699075	0.797576	1.03106	13
Hcm1p	205	-0.533325	0.703096	0.835995	1.09129	43
Kar4p	1	-0.581071	0.719404	0.204452	0	0
Stp2p	83	-0.607361	0.728194	0.801811	1.28153	26
Fkh1p	212	-0.642578	0.739751	0.827971	1.26211	53
Crz1p	46	-0.693118	0.755882	0.760499	1.19526	12
Gcr2p	125	-0.738675	0.769948	0.802458	1.11019	33
Hot1p	67	-0.754048	0.77459	0.772177	1.21905	18
Uga3p	84	-0.832022	0.797302	0.773708	0.964691	16
Pip2p	46	-0.869442	0.807697	0.730203	1.25116	11
Arg80p	87	-0.893207	0.814127	0.767899	1.14212	17
Fzf1p	80	-0.939728	0.826321	0.757069	1.22033	18
Gis1p	2	-1.01873	0.845835	0.041426	0.072765	0
Rph1p	72	-1.03898	0.850593	0.73683	0.888629	11
Rtg1p	84	-1.21141	0.887131	0.725469	1.18144	18
Aft1p	361	-1.26811	0.897621	0.801586	1.16332	84
Met32p	75	-1.33055	0.908331	0.700474	1.17116	19
Abf1p	459	-1.33688	0.909369	0.806632	1.21596	110
Haa1p	3	-1.43649	0.924568	-0.0859172	1.29727	0
Mig2p	21	-1.47834	0.930342	0.503815	1.20338	4
Cha4p	79	-1.77686	0.962204	0.646542	1.26479	18
Sip4p	75	-2.35534	0.990747	0.562577	1.1463	14
Reb1p	476	-2.80139	0.997456	0.72972	1.16694	95
