# Supplementary material for: Transcriptional remodelling in response to changing copper levels in the Wilson and Menkes disease model of Saccharomyces cerevisiae
Source: Royal Society of Chemistry journal article supplement (doi:10.1039/c3mb70276f), 2013-08-22
Supplement: c3mb70276f_3.pdf [file c3mb70276f_3.pdf]

ESI4. Enriched go-terms among the significantly expressed genes between changing copper levels in response to interaction effect of the change in the copper level and the deletion of *CCC2*.

| INTERACTION EFFECT |                   | Enriched GO-Biological Process Terms                                                                                                                                                                                                                                           |                                                                                                                                                                                                                                                                                                                                                                                                                              |
|--------------------|-------------------|--------------------------------------------------------------------------------------------------------------------------------------------------------------------------------------------------------------------------------------------------------------------------------|------------------------------------------------------------------------------------------------------------------------------------------------------------------------------------------------------------------------------------------------------------------------------------------------------------------------------------------------------------------------------------------------------------------------------|
|                    |                   | CCC2Δ/ CCC2Δ                                                                                                                                                                                                                                                                   | Reference strain                                                                                                                                                                                                                                                                                                                                                                                                             |
| UP                 | High Cu vs Low Cu | Arginine metabolic process (p-val≤ 2.89e-2)<br>Carboxylic acid metabolic process (p-val≤ 5.43e-3)                                                                                                                                                                              | Iron ion homeostasis (p-val≤ 3.04e-2)<br>Siderophore transport (p-val≤ 2.19e-2)                                                                                                                                                                                                                                                                                                                                              |
|                    | High Cu vs Cu Def | ATP synthesis coupled electron transport (p-val≤ 1.41e-2)                                                                                                                                                                                                                      | Iron ion homeostasis (p-val≤ 5.98e-3)<br>Siderophore transport (p-val≤ 1.11e-2)<br>"de novo" NAD biosynthetic process from tryptophan (p-val≤ 3.55e-2)<br>"de novo" UMP biosynthetic process (p-val≤ 4.27e-2)<br>Response to copper ion (p-val≤ 3.55e-2)<br>Cellular cell wall organization or biogenesis (p-val≤ 3.55e-2)<br>Nucleotide biosynthetic process (p-val≤ 1.27e-2)<br>Regulation of sporulation (p-val≤ 4.27e-2) |
| DOWN               | High Cu vs Cu Def | Iron ion homeostasis (p-val≤ 4.63e-3)<br>Siderophore transport (p-val≤ 1.52e-6)                                                                                                                                                                                                |                                                                                                                                                                                                                                                                                                                                                                                                                              |
|                    | Low Cu vs Cu Def  | Arginine metabolic process (p-val≤ 2.20e-03)<br>Ornithine (p-val≤ 8.34e-3) and urea (p-val≤ 5.24e-3) metabolic process<br>Drug membrane transport (p-val≤ 8.34e-3)<br>Cellular keton metabolic process (p-val≤ 9.47e-3)<br>"de novo" UMP biosynthetic process (p-val≤ 7.83e-3) |                                                                                                                                                                                                                                                                                                                                                                                                                              |
