# Supplementary material for: Transcriptional remodelling in response to changing copper levels in the Wilson and Menkes disease model of Saccharomyces cerevisiae
Source: Royal Society of Chemistry journal article supplement (doi:10.1039/c3mb70276f), 2013-08-22
Supplement: c3mb70276f_4.pdf [file c3mb70276f_4.pdf]

ESI 5. Enriched go-terms among the significantly expressed genes between two strains in response to interaction effect.

| INTERACTION EFFECT |                                        | Enriched GO-Biological Process Terms                                                                                                                                                                                                                                                                                                                                                                                                                                                                                                                       |                                                                                                                                                                                                                                                                                                       |
|--------------------|----------------------------------------|------------------------------------------------------------------------------------------------------------------------------------------------------------------------------------------------------------------------------------------------------------------------------------------------------------------------------------------------------------------------------------------------------------------------------------------------------------------------------------------------------------------------------------------------------------|-------------------------------------------------------------------------------------------------------------------------------------------------------------------------------------------------------------------------------------------------------------------------------------------------------|
|                    |                                        | Copper Deficient Conditions                                                                                                                                                                                                                                                                                                                                                                                                                                                                                                                                | High Copper Conditions                                                                                                                                                                                                                                                                                |
| UP                 | CCC2Δ/ CCC2Δ<br>vs<br>Reference strain | Iron ion homeostasis<br>(p-val ≤ 3.89e-4)<br>Siderophore transport<br>(p-val ≤ 1.30e-6)<br>Arginine metabolic process<br>(p-val ≤ 3.94e-2)<br>Cellular keton metabolic process (p-val ≤ 1.99e-2)<br>Drug membrane transport<br>(p-val ≤ 1.68e-2)<br>Urea (p-val ≤ 1.68e-2) and ornithine (p-val ≤ 2.68e-2) metabolic process<br>"de novo" NAD biosynthetic process from tryptophan<br>(p-val ≤ 1.91e-2)<br>"de novo" UMP biosynthetic process (p-val ≤ 3.94e-2)<br>Allantoin (p-val ≤ 2.55e-2) and pyridoxal phosphate (p-val ≤ 3.06e-2) metabolic process |                                                                                                                                                                                                                                                                                                       |
| DOWN               |                                        | Glucose transport<br>(p-val ≤ 3.65e-2)<br>Polyphosphate metabolic process (p-val ≤ 3.65e-2)<br>Ribosome biogenesis (p-val ≤ 3.65e-2)                                                                                                                                                                                                                                                                                                                                                                                                                       | Iron ion homeostasis<br>(p-val ≤ 8.58e-3)<br>Siderophore transport<br>(p-val ≤ 1.5e-3)<br>"de novo" NAD biosynthetic process from tryptophan<br>(p-val ≤ 1.04e-3)<br>Purine ribonucleoside triphosphate biosynthetic process<br>(p-val ≤ 2.41e-2)<br>Oxidation reduction process<br>(p-val ≤ 3.51e-2) |
